# Supplementary material for: A Novel Prediction Prognosis Model of sepsis with acute respiratory failure: A cohort study from the MIMIC-IV database
Source: Research Square preprint supplement (doi:10.21203/rs.3.rs-449660/v1), 2021-05-10
Supplement: Supplementary file 1 [file 98e4aed6209f7887d7cd079c.docx]

|  | **Table 7** Renal disease from the MIMIC IV database according to ICD9 and ICD10-codes | | | |
| --- | --- | --- | --- | --- |
|  | | ICD |  | Description |
| 586 | | 9 |  | Renal failure, unspecified |
| 5880 | | 9 | Renal osteodystrophy |
| V420 | | 9 | Kidney replaced by transplant |
| 5830 | | 9 | Nephritis and nephropathy, not specified as acute or chronic, with lesion of proliferative glomerulonephritis |
| 5837 | | 9 | Nephritis and nephropathy, not specified as acute or chronic, with lesion of renal medullary necrosis |
| 40301 | | 9 | Hypertensive chronic kidney disease, malignant, with chronic kidney disease stage V or end stage renal disease |
| 40311 | | 9 | Hypertensive chronic kidney disease, benign, with chronic kidney disease stage V or end stage renal disease |
| 40391 | | 9 | Hypertensive chronic kidney disease, unspecified, with chronic kidney disease stage V or end stage renal disease |
| 40402 | | 9 | Hypertensive heart and chronic kidney disease, malignant, without heart failure and with chronic kidney disease stage V or end stage renal disease |
| 40403 | | 9 | Hypertensive heart and chronic kidney disease, malignant, with heart failure and with chronic kidney disease stage V or end stage renal disease |
| 40412 | | 9 | Hypertensive heart and chronic kidney disease, benign, without heart failure and with chronic kidney disease stage V or end stage renal disease |
| 40413 | | 9 | Hypertensive heart and chronic kidney disease, benign, with heart failure and chronic kidney disease stage V or end stage renal disease |
| 40492 | | 9 | Hypertensive heart and chronic kidney disease, unspecified, without heart failure and with chronic kidney disease stage V or end stage renal disease |
| 40493 | | 9 | Hypertensive heart and chronic kidney disease, unspecified, with heart failure and chronic kidney disease stage V or end stage renal disease |
| N19 | | 10 | Unspecified kidney failure |
| I120 | | 10 | Hypertensive chronic kidney disease with stage 5 chronic kidney disease or end stage renal disease |
| N032 | | 10 | Chronic nephritic syndrome with diffuse membranous glomerulonephritis |
| N033 | | 10 | Chronic nephritic syndrome with diffuse mesangial proliferative glomerulonephritis |
| N034 | | 10 | Chronic nephritic syndrome with diffuse endocapillary proliferative glomerulonephritis |
| N035 | | 10 | Chronic nephritic syndrome with diffuse mesangiocapillary glomerulonephritis |
| N036 | | 10 | Chronic nephritic syndrome with dense deposit disease |
| N037 | | 10 | Chronic nephritic syndrome with diffuse crescentic glomerulonephritis |
| N052 | | 10 | Unspecified nephritic syndrome with diffuse membranous glomerulonephritis |
| N053 | | 10 | Unspecified nephritic syndrome with diffuse mesangial proliferative glomerulonephritis |
| N054 | | 10 | Unspecified nephritic syndrome with diffuse endocapillary proliferative glomerulonephritis |
| N055 | | 10 | Unspecified nephritic syndrome with diffuse mesangiocapillary glomerulonephritis |
| N056 | | 10 | Unspecified nephritic syndrome with dense deposit disease |
| N057 | | 10 | Unspecified nephritic syndrome with diffuse crescentic glomerulonephritis |
| N250 | | 10 | Renal osteodystrophy |
| Z940 | | 10 | Kidney transplant status |
| Z992 | | 10 | Dependence on renal dialysis |
