# Supplementary material for: A Novel Prediction Prognosis Model of sepsis with acute respiratory failure: A cohort study from the MIMIC-IV database
Source: Research Square preprint supplement (doi:10.21203/rs.3.rs-449660/v1), 2021-05-10
Supplement: Supplementary file 1 [file 9453981b68e76f735d983e88.docx]

| **Table**  Diabetes disease and ICD-codes | | |  |  |  |  |  |  |  |  |  |
| --- | --- | --- | --- | --- | --- | --- | --- | --- | --- | --- | --- |
| Disease | ICD-Code | Description |  |  |  |  |  |  |  |  |  |
| Diabetes |  |  |  |  |  |  |  |  |  |  |  |
|  | E9323 | Insulins and antidiabetic agents causing adverse effects in therapeutic use |  |  |  |  |  |  |  |  |  |
|  | 9623 | Poisoning by insulins and antidiabetic agents |  |  |  |  |  |  |  |  |  |
|  | 25000 | Diabetes mellitus without mention of complication, type II or unspecified type, not stated as uncontrolled |  |  |  |  |  |  |  |  |  |
|  | 25001 | Diabetes mellitus without mention of complication, type I [juvenile type], not stated as uncontrolled |  |  |  |  |  |  |  |  |  |
|  | 25002 | Diabetes mellitus without mention of complication, type II or unspecified type, uncontrolled |  |  |  |  |  |  |  |  |  |
|  | 25003 | Diabetes mellitus without mention of complication, type I [juvenile type], uncontrolled |  |  |  |  |  |  |  |  |  |
|  | 25010 | Diabetes with ketoacidosis, type II or unspecified type, not stated as uncontrolled |  |  |  |  |  |  |  |  |  |
|  | 25011 | Diabetes with ketoacidosis, type I [juvenile type], not stated as uncontrolled |  |  |  |  |  |  |  |  |  |
|  | 25012 | Diabetes with ketoacidosis, type II or unspecified type, uncontrolled |  |  |  |  |  |  |  |  |  |
|  | 25013 | Diabetes with ketoacidosis, type I [juvenile type], uncontrolled |  |  |  |  |  |  |  |  |  |
|  | 25020 | Diabetes with hyperosmolarity, type II or unspecified type, not stated as uncontrolled |  |  |  |  |  |  |  |  |  |
|  | 25021 | Diabetes with hyperosmolarity, type I [juvenile type], not stated as uncontrolled |  |  |  |  |  |  |  |  |  |
|  | 25022 | Diabetes with hyperosmolarity, type II or unspecified type, uncontrolled |  |  |  |  |  |  |  |  |  |
|  | 25023 | Diabetes with hyperosmolarity, type I [juvenile type], uncontrolled |  |  |  |  |  |  |  |  |  |
|  | 25030 | Diabetes with other coma, type II or unspecified type, not stated as uncontrolled |  |  |  |  |  |  |  |  |  |
|  | 25031 | Diabetes with other coma, type I [juvenile type], not stated as uncontrolled |  |  |  |  |  |  |  |  |  |
|  | 25032 | Diabetes with other coma, type II or unspecified type, uncontrolled |  |  |  |  |  |  |  |  |  |
|  | 25033 | Diabetes with other coma, type I [juvenile type], uncontrolled |  |  |  |  |  |  |  |  |  |
|  | 25040 | Diabetes with renal manifestations, type II or unspecified type, not stated as uncontrolled |  |  |  |  |  |  |  |  |  |
|  | 24900 | Secondary diabetes mellitus without mention of complication, not stated as uncontrolled, or unspecified |  |  |  |  |  |  |  |  |  |
|  | 24901 | Secondary diabetes mellitus without mention of complication, uncontrolled |  |  |  |  |  |  |  |  |  |
|  | 24910 | Secondary diabetes mellitus with ketoacidosis, not stated as uncontrolled, or unspecified |  |  |  |  |  |  |  |  |  |
|  | 24911 | Secondary diabetes mellitus with ketoacidosis, uncontrolled |  |  |  |  |  |  |  |  |  |
|  | 24920 | Secondary diabetes mellitus with hyperosmolarity, not stated as uncontrolled, or unspecified |  |  |  |  |  |  |  |  |  |
|  | 24921 | Secondary diabetes mellitus with hyperosmolarity, uncontrolled |  |  |  |  |  |  |  |  |  |
|  | 24930 | Secondary diabetes mellitus with other coma, not stated as uncontrolled, or unspecified |  |  |  |  |  |  |  |  |  |
|  | 24931 | Secondary diabetes mellitus with other coma, uncontrolled |  |  |  |  |  |  |  |  |  |
|  | 24940 | Secondary diabetes mellitus with renal manifestations, not stated as uncontrolled, or unspecified |  |  |  |  |  |  |  |  |  |
|  | 24941 | Secondary diabetes mellitus with renal manifestations, uncontrolled |  |  |  |  |  |  |  |  |  |
|  | 24950 | Secondary diabetes mellitus with ophthalmic manifestations, not stated as uncontrolled, or unspecified |  |  |  |  |  |  |  |  |  |
|  | 24951 | Secondary diabetes mellitus with ophthalmic manifestations, uncontrolled |  |  |  |  |  |  |  |  |  |
|  | 24960 | Secondary diabetes mellitus with neurological manifestations, not stated as uncontrolled, or unspecified |  |  |  |  |  |  |  |  |  |
|  | 24961 | Secondary diabetes mellitus with neurological manifestations, uncontrolled |  |  |  |  |  |  |  |  |  |
|  | 24970 | Secondary diabetes mellitus with peripheral circulatory disorders, not stated as uncontrolled, or unspecified |  |  |  |  |  |  |  |  |  |
|  | 24971 | Secondary diabetes mellitus with peripheral circulatory disorders, uncontrolled |  |  |  |  |  |  |  |  |  |
|  | 24980 | Secondary diabetes mellitus with other specified manifestations, not stated as uncontrolled, or unspecified |  |  |  |  |  |  |  |  |  |
|  | 24981 | Secondary diabetes mellitus with other specified manifestations, uncontrolled |  |  |  |  |  |  |  |  |  |
|  | 24990 | Secondary diabetes mellitus with unspecified complication, not stated as uncontrolled, or unspecified |  |  |  |  |  |  |  |  |  |
|  | 24991 | Secondary diabetes mellitus with unspecified complication, uncontrolled |  |  |  |  |  |  |  |  |  |
|  | 25041 | Diabetes with renal manifestations, type I [juvenile type], not stated as uncontrolled |  |  |  |  |  |  |  |  |  |
|  | 25042 | Diabetes with renal manifestations, type II or unspecified type, uncontrolled |  |  |  |  |  |  |  |  |  |
|  | 25043 | Diabetes with renal manifestations, type I [juvenile type], uncontrolled |  |  |  |  |  |  |  |  |  |
|  | 25050 | Diabetes with ophthalmic manifestations, type II or unspecified type, not stated as uncontrolled |  |  |  |  |  |  |  |  |  |
|  | 25051 | Diabetes with ophthalmic manifestations, type I [juvenile type], not stated as uncontrolled |  |  |  |  |  |  |  |  |  |
|  | 25052 | Diabetes with ophthalmic manifestations, type II or unspecified type, uncontrolled |  |  |  |  |  |  |  |  |  |
|  | 25053 | Diabetes with ophthalmic manifestations, type I [juvenile type], uncontrolled |  |  |  |  |  |  |  |  |  |
|  | 25060 | Diabetes with neurological manifestations, type II or unspecified type, not stated as uncontrolled |  |  |  |  |  |  |  |  |  |
|  | 25061 | Diabetes with neurological manifestations, type I [juvenile type], not stated as uncontrolled |  |  |  |  |  |  |  |  |  |
|  | 25062 | Diabetes with neurological manifestations, type II or unspecified type, uncontrolled |  |  |  |  |  |  |  |  |  |
|  | 25063 | Diabetes with neurological manifestations, type I [juvenile type], uncontrolled |  |  |  |  |  |  |  |  |  |
|  | 25070 | Diabetes with peripheral circulatory disorders, type II or unspecified type, not stated as uncontrolled |  |  |  |  |  |  |  |  |  |
|  | 25071 | Diabetes with peripheral circulatory disorders, type I [juvenile type], not stated as uncontrolled |  |  |  |  |  |  |  |  |  |
|  | 25072 | Diabetes with peripheral circulatory disorders, type II or unspecified type, uncontrolled |  |  |  |  |  |  |  |  |  |
|  | 25073 | Diabetes with peripheral circulatory disorders, type I [juvenile type], uncontrolled |  |  |  |  |  |  |  |  |  |
|  | 25080 | Diabetes with other specified manifestations, type II or unspecified type, not stated as uncontrolled |  |  |  |  |  |  |  |  |  |
|  | 25081 | Diabetes with other specified manifestations, type I [juvenile type], not stated as uncontrolled |  |  |  |  |  |  |  |  |  |
|  | 25082 | Diabetes with other specified manifestations, type II or unspecified type, uncontrolled |  |  |  |  |  |  |  |  |  |
|  | 25083 | Diabetes with other specified manifestations, type I [juvenile type], uncontrolled |  |  |  |  |  |  |  |  |  |
|  | 25090 | Diabetes with unspecified complication, type II or unspecified type, not stated as uncontrolled |  |  |  |  |  |  |  |  |  |
|  | 25091 | Diabetes with unspecified complication, type I [juvenile type], not stated as uncontrolled |  |  |  |  |  |  |  |  |  |
|  | 25092 | Diabetes with unspecified complication, type II or unspecified type, uncontrolled |  |  |  |  |  |  |  |  |  |
|  | 25093 | Diabetes with unspecified complication, type I [juvenile type], uncontrolled |  |  |  |  |  |  |  |  |  |
|  | E0801 | Diabetes mellitus due to underlying condition with hyperosmolarity with coma |  |  |  |  |  |  |  |  |  |
|  | E0810 | Diabetes mellitus due to underlying condition with ketoacidosis without coma |  |  |  |  |  |  |  |  |  |
|  | E0811 | Diabetes mellitus due to underlying condition with ketoacidosis with coma |  |  |  |  |  |  |  |  |  |
|  | E0821 | Diabetes mellitus due to underlying condition with diabetic nephropathy |  |  |  |  |  |  |  |  |  |
|  | E0822 | Diabetes mellitus due to underlying condition with diabetic chronic kidney disease |  |  |  |  |  |  |  |  |  |
|  | E0829 | Diabetes mellitus due to underlying condition with other diabetic kidney complication |  |  |  |  |  |  |  |  |  |
|  | E08311 | Diabetes mellitus due to underlying condition with unspecified diabetic retinopathy with macular edema |  |  |  |  |  |  |  |  |  |
|  | E08319 | Diabetes mellitus due to underlying condition with unspecified diabetic retinopathy without macular edema |  |  |  |  |  |  |  |  |  |
|  | E083211 | Diabetes mellitus due to underlying condition with mild nonproliferative diabetic retinopathy with macular edema, right eye |  |  |  |  |  |  |  |  |  |
|  | E083212 | Diabetes mellitus due to underlying condition with mild nonproliferative diabetic retinopathy with macular edema, left eye |  |  |  |  |  |  |  |  |  |
|  | E083213 | Diabetes mellitus due to underlying condition with mild nonproliferative diabetic retinopathy with macular edema, bilateral |  |  |  |  |  |  |  |  |  |
|  | E083219 | Diabetes mellitus due to underlying condition with mild nonproliferative diabetic retinopathy with macular edema, unspecified eye |  |  |  |  |  |  |  |  |  |
|  | E083291 | Diabetes mellitus due to underlying condition with mild nonproliferative diabetic retinopathy without macular edema, right eye |  |  |  |  |  |  |  |  |  |
|  | E083292 | Diabetes mellitus due to underlying condition with mild nonproliferative diabetic retinopathy without macular edema, left eye |  |  |  |  |  |  |  |  |  |
|  | E083293 | Diabetes mellitus due to underlying condition with mild nonproliferative diabetic retinopathy without macular edema, bilateral |  |  |  |  |  |  |  |  |  |
|  | E083299 | Diabetes mellitus due to underlying condition with mild nonproliferative diabetic retinopathy without macular edema, unspecified eye |  |  |  |  |  |  |  |  |  |
|  | E083311 | Diabetes mellitus due to underlying condition with moderate nonproliferative diabetic retinopathy with macular edema, right eye |  |  |  |  |  |  |  |  |  |
|  | E083312 | Diabetes mellitus due to underlying condition with moderate nonproliferative diabetic retinopathy with macular edema, left eye |  |  |  |  |  |  |  |  |  |
|  | E083313 | Diabetes mellitus due to underlying condition with moderate nonproliferative diabetic retinopathy with macular edema, bilateral |  |  |  |  |  |  |  |  |  |
|  | E083319 | Diabetes mellitus due to underlying condition with moderate nonproliferative diabetic retinopathy with macular edema, unspecified eye |  |  |  |  |  |  |  |  |  |
|  | E083391 | Diabetes mellitus due to underlying condition with moderate nonproliferative diabetic retinopathy without macular edema, right eye |  |  |  |  |  |  |  |  |  |
|  | E083392 | Diabetes mellitus due to underlying condition with moderate nonproliferative diabetic retinopathy without macular edema, left eye |  |  |  |  |  |  |  |  |  |
|  | E083393 | Diabetes mellitus due to underlying condition with moderate nonproliferative diabetic retinopathy without macular edema, bilateral |  |  |  |  |  |  |  |  |  |
|  | E083399 | Diabetes mellitus due to underlying condition with moderate nonproliferative diabetic retinopathy without macular edema, unspecified eye |  |  |  |  |  |  |  |  |  |
|  | E083411 | Diabetes mellitus due to underlying condition with severe nonproliferative diabetic retinopathy with macular edema, right eye |  |  |  |  |  |  |  |  |  |
|  | E083412 | Diabetes mellitus due to underlying condition with severe nonproliferative diabetic retinopathy with macular edema, left eye |  |  |  |  |  |  |  |  |  |
|  | E083413 | Diabetes mellitus due to underlying condition with severe nonproliferative diabetic retinopathy with macular edema, bilateral |  |  |  |  |  |  |  |  |  |
|  | E083419 | Diabetes mellitus due to underlying condition with severe nonproliferative diabetic retinopathy with macular edema, unspecified eye |  |  |  |  |  |  |  |  |  |
|  | E083491 | Diabetes mellitus due to underlying condition with severe nonproliferative diabetic retinopathy without macular edema, right eye |  |  |  |  |  |  |  |  |  |
|  | E083492 | Diabetes mellitus due to underlying condition with severe nonproliferative diabetic retinopathy without macular edema, left eye |  |  |  |  |  |  |  |  |  |
|  | E083493 | Diabetes mellitus due to underlying condition with severe nonproliferative diabetic retinopathy without macular edema, bilateral |  |  |  |  |  |  |  |  |  |
|  | E109 | Type 1 diabetes mellitus without complications |  |  |  |  |  |  |  |  |  |
|  | E083499 | Diabetes mellitus due to underlying condition with severe nonproliferative diabetic retinopathy without macular edema, unspecified eye |  |  |  |  |  |  |  |  |  |
|  | E083511 | Diabetes mellitus due to underlying condition with proliferative diabetic retinopathy with macular edema, right eye |  |  |  |  |  |  |  |  |  |
|  | E083512 | Diabetes mellitus due to underlying condition with proliferative diabetic retinopathy with macular edema, left eye |  |  |  |  |  |  |  |  |  |
|  | E083513 | Diabetes mellitus due to underlying condition with proliferative diabetic retinopathy with macular edema, bilateral |  |  |  |  |  |  |  |  |  |
|  | E083519 | Diabetes mellitus due to underlying condition with proliferative diabetic retinopathy with macular edema, unspecified eye |  |  |  |  |  |  |  |  |  |
|  | E083521 | Diabetes mellitus due to underlying condition with proliferative diabetic retinopathy with traction retinal detachment involving the macula, right eye |  |  |  |  |  |  |  |  |  |
|  | E083522 | Diabetes mellitus due to underlying condition with proliferative diabetic retinopathy with traction retinal detachment involving the macula, left eye |  |  |  |  |  |  |  |  |  |
|  | E083523 | Diabetes mellitus due to underlying condition with proliferative diabetic retinopathy with traction retinal detachment involving the macula, bilateral |  |  |  |  |  |  |  |  |  |
|  | E083529 | Diabetes mellitus due to underlying condition with proliferative diabetic retinopathy with traction retinal detachment involving the macula, unspecified eye |  |  |  |  |  |  |  |  |  |
|  | E083531 | Diabetes mellitus due to underlying condition with proliferative diabetic retinopathy with traction retinal detachment not involving the macula, right eye |  |  |  |  |  |  |  |  |  |
|  | E083532 | Diabetes mellitus due to underlying condition with proliferative diabetic retinopathy with traction retinal detachment not involving the macula, left eye |  |  |  |  |  |  |  |  |  |
|  | E083533 | Diabetes mellitus due to underlying condition with proliferative diabetic retinopathy with traction retinal detachment not involving the macula, bilateral |  |  |  |  |  |  |  |  |  |
|  | E083539 | Diabetes mellitus due to underlying condition with proliferative diabetic retinopathy with traction retinal detachment not involving the macula, unspecified eye |  |  |  |  |  |  |  |  |  |
|  | E083541 | Diabetes mellitus due to underlying condition with proliferative diabetic retinopathy with combined traction retinal detachment and rhegmatogenous retinal detachment, right eye |  |  |  |  |  |  |  |  |  |
|  | E083542 | Diabetes mellitus due to underlying condition with proliferative diabetic retinopathy with combined traction retinal detachment and rhegmatogenous retinal detachment, left eye |  |  |  |  |  |  |  |  |  |
|  | E083543 | Diabetes mellitus due to underlying condition with proliferative diabetic retinopathy with combined traction retinal detachment and rhegmatogenous retinal detachment, bilateral |  |  |  |  |  |  |  |  |  |
|  | E083549 | Diabetes mellitus due to underlying condition with proliferative diabetic retinopathy with combined traction retinal detachment and rhegmatogenous retinal detachment, unspecified eye |  |  |  |  |  |  |  |  |  |
|  | E083551 | Diabetes mellitus due to underlying condition with stable proliferative diabetic retinopathy, right eye |  |  |  |  |  |  |  |  |  |
|  | E083552 | Diabetes mellitus due to underlying condition with stable proliferative diabetic retinopathy, left eye |  |  |  |  |  |  |  |  |  |
|  | E083553 | Diabetes mellitus due to underlying condition with stable proliferative diabetic retinopathy, bilateral |  |  |  |  |  |  |  |  |  |
|  | E083559 | Diabetes mellitus due to underlying condition with stable proliferative diabetic retinopathy, unspecified eye |  |  |  |  |  |  |  |  |  |
|  | E083591 | Diabetes mellitus due to underlying condition with proliferative diabetic retinopathy without macular edema, right eye |  |  |  |  |  |  |  |  |  |
|  | E083592 | Diabetes mellitus due to underlying condition with proliferative diabetic retinopathy without macular edema, left eye |  |  |  |  |  |  |  |  |  |
|  | E083593 | Diabetes mellitus due to underlying condition with proliferative diabetic retinopathy without macular edema, bilateral |  |  |  |  |  |  |  |  |  |
|  | E083599 | Diabetes mellitus due to underlying condition with proliferative diabetic retinopathy without macular edema, unspecified eye |  |  |  |  |  |  |  |  |  |
|  | E0836 | Diabetes mellitus due to underlying condition with diabetic cataract |  |  |  |  |  |  |  |  |  |
|  | E0837X1 | Diabetes mellitus due to underlying condition with diabetic macular edema, resolved following treatment, right eye |  |  |  |  |  |  |  |  |  |
|  | E0837X2 | Diabetes mellitus due to underlying condition with diabetic macular edema, resolved following treatment, left eye |  |  |  |  |  |  |  |  |  |
|  | E0837X3 | Diabetes mellitus due to underlying condition with diabetic macular edema, resolved following treatment, bilateral |  |  |  |  |  |  |  |  |  |
|  | E0837X9 | Diabetes mellitus due to underlying condition with diabetic macular edema, resolved following treatment, unspecified eye |  |  |  |  |  |  |  |  |  |
|  | E0839 | Diabetes mellitus due to underlying condition with other diabetic ophthalmic complication |  |  |  |  |  |  |  |  |  |
|  | E0840 | Diabetes mellitus due to underlying condition with diabetic neuropathy, unspecified |  |  |  |  |  |  |  |  |  |
|  | E0841 | Diabetes mellitus due to underlying condition with diabetic mononeuropathy |  |  |  |  |  |  |  |  |  |
|  | E0842 | Diabetes mellitus due to underlying condition with diabetic polyneuropathy |  |  |  |  |  |  |  |  |  |
|  | E0843 | Diabetes mellitus due to underlying condition with diabetic autonomic (poly)neuropathy |  |  |  |  |  |  |  |  |  |
|  | E0844 | Diabetes mellitus due to underlying condition with diabetic amyotrophy |  |  |  |  |  |  |  |  |  |
|  | E0849 | Diabetes mellitus due to underlying condition with other diabetic neurological complication |  |  |  |  |  |  |  |  |  |
|  | E0851 | Diabetes mellitus due to underlying condition with diabetic peripheral angiopathy without gangrene |  |  |  |  |  |  |  |  |  |
|  | E0852 | Diabetes mellitus due to underlying condition with diabetic peripheral angiopathy with gangrene |  |  |  |  |  |  |  |  |  |
|  | E0859 | Diabetes mellitus due to underlying condition with other circulatory complications |  |  |  |  |  |  |  |  |  |
|  | E08610 | Diabetes mellitus due to underlying condition with diabetic neuropathic arthropathy |  |  |  |  |  |  |  |  |  |
|  | E08618 | Diabetes mellitus due to underlying condition with other diabetic arthropathy |  |  |  |  |  |  |  |  |  |
|  | E08620 | Diabetes mellitus due to underlying condition with diabetic dermatitis |  |  |  |  |  |  |  |  |  |
|  | E08621 | Diabetes mellitus due to underlying condition with foot ulcer |  |  |  |  |  |  |  |  |  |
|  | E08622 | Diabetes mellitus due to underlying condition with other skin ulcer |  |  |  |  |  |  |  |  |  |
|  | E08628 | Diabetes mellitus due to underlying condition with other skin complications |  |  |  |  |  |  |  |  |  |
|  | E08630 | Diabetes mellitus due to underlying condition with periodontal disease |  |  |  |  |  |  |  |  |  |
|  | E08638 | Diabetes mellitus due to underlying condition with other oral complications |  |  |  |  |  |  |  |  |  |
|  | E08641 | Diabetes mellitus due to underlying condition with hypoglycemia with coma |  |  |  |  |  |  |  |  |  |
|  | E08649 | Diabetes mellitus due to underlying condition with hypoglycemia without coma |  |  |  |  |  |  |  |  |  |
|  | E0865 | Diabetes mellitus due to underlying condition with hyperglycemia |  |  |  |  |  |  |  |  |  |
|  | E0869 | Diabetes mellitus due to underlying condition with other specified complication |  |  |  |  |  |  |  |  |  |
|  | E088 | Diabetes mellitus due to underlying condition with unspecified complications |  |  |  |  |  |  |  |  |  |
|  | E089 | Diabetes mellitus due to underlying condition without complications |  |  |  |  |  |  |  |  |  |
|  | E0900 | Drug or chemical induced diabetes mellitus with hyperosmolarity without nonketotic hyperglycemic-hyperosmolar coma (NKHHC) |  |  |  |  |  |  |  |  |  |
|  | E0901 | Drug or chemical induced diabetes mellitus with hyperosmolarity with coma |  |  |  |  |  |  |  |  |  |
|  | E0910 | Drug or chemical induced diabetes mellitus with ketoacidosis without coma |  |  |  |  |  |  |  |  |  |
|  | E0911 | Drug or chemical induced diabetes mellitus with ketoacidosis with coma |  |  |  |  |  |  |  |  |  |
|  | E0921 | Drug or chemical induced diabetes mellitus with diabetic nephropathy |  |  |  |  |  |  |  |  |  |
|  | E0922 | Drug or chemical induced diabetes mellitus with diabetic chronic kidney disease |  |  |  |  |  |  |  |  |  |
|  | E0929 | Drug or chemical induced diabetes mellitus with other diabetic kidney complication |  |  |  |  |  |  |  |  |  |
|  | E09311 | Drug or chemical induced diabetes mellitus with unspecified diabetic retinopathy with macular edema |  |  |  |  |  |  |  |  |  |
|  | E09319 | Drug or chemical induced diabetes mellitus with unspecified diabetic retinopathy without macular edema |  |  |  |  |  |  |  |  |  |
|  | E093211 | Drug or chemical induced diabetes mellitus with mild nonproliferative diabetic retinopathy with macular edema, right eye |  |  |  |  |  |  |  |  |  |
|  | E093212 | Drug or chemical induced diabetes mellitus with mild nonproliferative diabetic retinopathy with macular edema, left eye |  |  |  |  |  |  |  |  |  |
|  | E093213 | Drug or chemical induced diabetes mellitus with mild nonproliferative diabetic retinopathy with macular edema, bilateral |  |  |  |  |  |  |  |  |  |
|  | E093219 | Drug or chemical induced diabetes mellitus with mild nonproliferative diabetic retinopathy with macular edema, unspecified eye |  |  |  |  |  |  |  |  |  |
|  | E093291 | Drug or chemical induced diabetes mellitus with mild nonproliferative diabetic retinopathy without macular edema, right eye |  |  |  |  |  |  |  |  |  |
|  | E093292 | Drug or chemical induced diabetes mellitus with mild nonproliferative diabetic retinopathy without macular edema, left eye |  |  |  |  |  |  |  |  |  |
|  | E093293 | Drug or chemical induced diabetes mellitus with mild nonproliferative diabetic retinopathy without macular edema, bilateral |  |  |  |  |  |  |  |  |  |
|  | E093299 | Drug or chemical induced diabetes mellitus with mild nonproliferative diabetic retinopathy without macular edema, unspecified eye |  |  |  |  |  |  |  |  |  |
|  | E093311 | Drug or chemical induced diabetes mellitus with moderate nonproliferative diabetic retinopathy with macular edema, right eye |  |  |  |  |  |  |  |  |  |
|  | E093312 | Drug or chemical induced diabetes mellitus with moderate nonproliferative diabetic retinopathy with macular edema, left eye |  |  |  |  |  |  |  |  |  |
|  | E093313 | Drug or chemical induced diabetes mellitus with moderate nonproliferative diabetic retinopathy with macular edema, bilateral |  |  |  |  |  |  |  |  |  |
|  | E093319 | Drug or chemical induced diabetes mellitus with moderate nonproliferative diabetic retinopathy with macular edema, unspecified eye |  |  |  |  |  |  |  |  |  |
|  | E093391 | Drug or chemical induced diabetes mellitus with moderate nonproliferative diabetic retinopathy without macular edema, right eye |  |  |  |  |  |  |  |  |  |
|  | E093392 | Drug or chemical induced diabetes mellitus with moderate nonproliferative diabetic retinopathy without macular edema, left eye |  |  |  |  |  |  |  |  |  |
|  | E093393 | Drug or chemical induced diabetes mellitus with moderate nonproliferative diabetic retinopathy without macular edema, bilateral |  |  |  |  |  |  |  |  |  |
|  | E093399 | Drug or chemical induced diabetes mellitus with moderate nonproliferative diabetic retinopathy without macular edema, unspecified eye |  |  |  |  |  |  |  |  |  |
|  | E093411 | Drug or chemical induced diabetes mellitus with severe nonproliferative diabetic retinopathy with macular edema, right eye |  |  |  |  |  |  |  |  |  |
|  | E093412 | Drug or chemical induced diabetes mellitus with severe nonproliferative diabetic retinopathy with macular edema, left eye |  |  |  |  |  |  |  |  |  |
|  | E093413 | Drug or chemical induced diabetes mellitus with severe nonproliferative diabetic retinopathy with macular edema, bilateral |  |  |  |  |  |  |  |  |  |
|  | E093419 | Drug or chemical induced diabetes mellitus with severe nonproliferative diabetic retinopathy with macular edema, unspecified eye |  |  |  |  |  |  |  |  |  |
|  | E093491 | Drug or chemical induced diabetes mellitus with severe nonproliferative diabetic retinopathy without macular edema, right eye |  |  |  |  |  |  |  |  |  |
|  | E093492 | Drug or chemical induced diabetes mellitus with severe nonproliferative diabetic retinopathy without macular edema, left eye |  |  |  |  |  |  |  |  |  |
|  | E093493 | Drug or chemical induced diabetes mellitus with severe nonproliferative diabetic retinopathy without macular edema, bilateral |  |  |  |  |  |  |  |  |  |
|  | E093499 | Drug or chemical induced diabetes mellitus with severe nonproliferative diabetic retinopathy without macular edema, unspecified eye |  |  |  |  |  |  |  |  |  |
|  | E093511 | Drug or chemical induced diabetes mellitus with proliferative diabetic retinopathy with macular edema, right eye |  |  |  |  |  |  |  |  |  |
|  | E093512 | Drug or chemical induced diabetes mellitus with proliferative diabetic retinopathy with macular edema, left eye |  |  |  |  |  |  |  |  |  |
|  | E093513 | Drug or chemical induced diabetes mellitus with proliferative diabetic retinopathy with macular edema, bilateral |  |  |  |  |  |  |  |  |  |
|  | E093519 | Drug or chemical induced diabetes mellitus with proliferative diabetic retinopathy with macular edema, unspecified eye |  |  |  |  |  |  |  |  |  |
|  | E093521 | Drug or chemical induced diabetes mellitus with proliferative diabetic retinopathy with traction retinal detachment involving the macula, right eye |  |  |  |  |  |  |  |  |  |
|  | E093522 | Drug or chemical induced diabetes mellitus with proliferative diabetic retinopathy with traction retinal detachment involving the macula, left eye |  |  |  |  |  |  |  |  |  |
|  | E093523 | Drug or chemical induced diabetes mellitus with proliferative diabetic retinopathy with traction retinal detachment involving the macula, bilateral |  |  |  |  |  |  |  |  |  |
|  | E093529 | Drug or chemical induced diabetes mellitus with proliferative diabetic retinopathy with traction retinal detachment involving the macula, unspecified eye |  |  |  |  |  |  |  |  |  |
|  | E093531 | Drug or chemical induced diabetes mellitus with proliferative diabetic retinopathy with traction retinal detachment not involving the macula, right eye |  |  |  |  |  |  |  |  |  |
|  | E093532 | Drug or chemical induced diabetes mellitus with proliferative diabetic retinopathy with traction retinal detachment not involving the macula, left eye |  |  |  |  |  |  |  |  |  |
|  | E093533 | Drug or chemical induced diabetes mellitus with proliferative diabetic retinopathy with traction retinal detachment not involving the macula, bilateral |  |  |  |  |  |  |  |  |  |
|  | E093539 | Drug or chemical induced diabetes mellitus with proliferative diabetic retinopathy with traction retinal detachment not involving the macula, unspecified eye |  |  |  |  |  |  |  |  |  |
|  | E093541 | Drug or chemical induced diabetes mellitus with proliferative diabetic retinopathy with combined traction retinal detachment and rhegmatogenous retinal detachment, right eye |  |  |  |  |  |  |  |  |  |
|  | E093542 | Drug or chemical induced diabetes mellitus with proliferative diabetic retinopathy with combined traction retinal detachment and rhegmatogenous retinal detachment, left eye |  |  |  |  |  |  |  |  |  |
|  | E093543 | Drug or chemical induced diabetes mellitus with proliferative diabetic retinopathy with combined traction retinal detachment and rhegmatogenous retinal detachment, bilateral |  |  |  |  |  |  |  |  |  |
|  | E208 | Other hypoparathyroidism |  |  |  |  |  |  |  |  |  |
|  | E093549 | Drug or chemical induced diabetes mellitus with proliferative diabetic retinopathy with combined traction retinal detachment and rhegmatogenous retinal detachment, unspecified eye |  |  |  |  |  |  |  |  |  |
|  | E093551 | Drug or chemical induced diabetes mellitus with stable proliferative diabetic retinopathy, right eye |  |  |  |  |  |  |  |  |  |
|  | E093552 | Drug or chemical induced diabetes mellitus with stable proliferative diabetic retinopathy, left eye |  |  |  |  |  |  |  |  |  |
|  | E093553 | Drug or chemical induced diabetes mellitus with stable proliferative diabetic retinopathy, bilateral |  |  |  |  |  |  |  |  |  |
|  | E093559 | Drug or chemical induced diabetes mellitus with stable proliferative diabetic retinopathy, unspecified eye |  |  |  |  |  |  |  |  |  |
|  | E093591 | Drug or chemical induced diabetes mellitus with proliferative diabetic retinopathy without macular edema, right eye |  |  |  |  |  |  |  |  |  |
|  | E093592 | Drug or chemical induced diabetes mellitus with proliferative diabetic retinopathy without macular edema, left eye |  |  |  |  |  |  |  |  |  |
|  | E093593 | Drug or chemical induced diabetes mellitus with proliferative diabetic retinopathy without macular edema, bilateral |  |  |  |  |  |  |  |  |  |
|  | E093599 | Drug or chemical induced diabetes mellitus with proliferative diabetic retinopathy without macular edema, unspecified eye |  |  |  |  |  |  |  |  |  |
|  | E0936 | Drug or chemical induced diabetes mellitus with diabetic cataract |  |  |  |  |  |  |  |  |  |
|  | E0937X1 | Drug or chemical induced diabetes mellitus with diabetic macular edema, resolved following treatment, right eye |  |  |  |  |  |  |  |  |  |
|  | E0937X2 | Drug or chemical induced diabetes mellitus with diabetic macular edema, resolved following treatment, left eye |  |  |  |  |  |  |  |  |  |
|  | E0937X3 | Drug or chemical induced diabetes mellitus with diabetic macular edema, resolved following treatment, bilateral |  |  |  |  |  |  |  |  |  |
|  | E0937X9 | Drug or chemical induced diabetes mellitus with diabetic macular edema, resolved following treatment, unspecified eye |  |  |  |  |  |  |  |  |  |
|  | E0939 | Drug or chemical induced diabetes mellitus with other diabetic ophthalmic complication |  |  |  |  |  |  |  |  |  |
|  | E0940 | Drug or chemical induced diabetes mellitus with neurological complications with diabetic neuropathy, unspecified |  |  |  |  |  |  |  |  |  |
|  | E0941 | Drug or chemical induced diabetes mellitus with neurological complications with diabetic mononeuropathy |  |  |  |  |  |  |  |  |  |
|  | E0942 | Drug or chemical induced diabetes mellitus with neurological complications with diabetic polyneuropathy |  |  |  |  |  |  |  |  |  |
|  | E0943 | Drug or chemical induced diabetes mellitus with neurological complications with diabetic autonomic (poly)neuropathy |  |  |  |  |  |  |  |  |  |
|  | E0944 | Drug or chemical induced diabetes mellitus with neurological complications with diabetic amyotrophy |  |  |  |  |  |  |  |  |  |
|  | E0949 | Drug or chemical induced diabetes mellitus with neurological complications with other diabetic neurological complication |  |  |  |  |  |  |  |  |  |
|  | E0951 | Drug or chemical induced diabetes mellitus with diabetic peripheral angiopathy without gangrene |  |  |  |  |  |  |  |  |  |
|  | E0952 | Drug or chemical induced diabetes mellitus with diabetic peripheral angiopathy with gangrene |  |  |  |  |  |  |  |  |  |
|  | E0959 | Drug or chemical induced diabetes mellitus with other circulatory complications |  |  |  |  |  |  |  |  |  |
|  | E09610 | Drug or chemical induced diabetes mellitus with diabetic neuropathic arthropathy |  |  |  |  |  |  |  |  |  |
|  | E09618 | Drug or chemical induced diabetes mellitus with other diabetic arthropathy |  |  |  |  |  |  |  |  |  |
|  | E09620 | Drug or chemical induced diabetes mellitus with diabetic dermatitis |  |  |  |  |  |  |  |  |  |
|  | E09621 | Drug or chemical induced diabetes mellitus with foot ulcer |  |  |  |  |  |  |  |  |  |
|  | E09622 | Drug or chemical induced diabetes mellitus with other skin ulcer |  |  |  |  |  |  |  |  |  |
|  | E09628 | Drug or chemical induced diabetes mellitus with other skin complications |  |  |  |  |  |  |  |  |  |
|  | E09630 | Drug or chemical induced diabetes mellitus with periodontal disease |  |  |  |  |  |  |  |  |  |
|  | E09638 | Drug or chemical induced diabetes mellitus with other oral complications |  |  |  |  |  |  |  |  |  |
|  | E09641 | Drug or chemical induced diabetes mellitus with hypoglycemia with coma |  |  |  |  |  |  |  |  |  |
|  | E09649 | Drug or chemical induced diabetes mellitus with hypoglycemia without coma |  |  |  |  |  |  |  |  |  |
|  | E0965 | Drug or chemical induced diabetes mellitus with hyperglycemia |  |  |  |  |  |  |  |  |  |
|  | E0969 | Drug or chemical induced diabetes mellitus with other specified complication |  |  |  |  |  |  |  |  |  |
|  | E098 | Drug or chemical induced diabetes mellitus with unspecified complications |  |  |  |  |  |  |  |  |  |
|  | E099 | Drug or chemical induced diabetes mellitus without complications |  |  |  |  |  |  |  |  |  |
|  | E1010 | Type 1 diabetes mellitus with ketoacidosis without coma |  |  |  |  |  |  |  |  |  |
|  | E1011 | Type 1 diabetes mellitus with ketoacidosis with coma |  |  |  |  |  |  |  |  |  |
|  | E1021 | Type 1 diabetes mellitus with diabetic nephropathy |  |  |  |  |  |  |  |  |  |
|  | E1022 | Type 1 diabetes mellitus with diabetic chronic kidney disease |  |  |  |  |  |  |  |  |  |
|  | E1029 | Type 1 diabetes mellitus with other diabetic kidney complication |  |  |  |  |  |  |  |  |  |
|  | E10311 | Type 1 diabetes mellitus with unspecified diabetic retinopathy with macular edema |  |  |  |  |  |  |  |  |  |
|  | E10319 | Type 1 diabetes mellitus with unspecified diabetic retinopathy without macular edema |  |  |  |  |  |  |  |  |  |
|  | E103211 | Type 1 diabetes mellitus with mild nonproliferative diabetic retinopathy with macular edema, right eye |  |  |  |  |  |  |  |  |  |
|  | E103212 | Type 1 diabetes mellitus with mild nonproliferative diabetic retinopathy with macular edema, left eye |  |  |  |  |  |  |  |  |  |
|  | E103213 | Type 1 diabetes mellitus with mild nonproliferative diabetic retinopathy with macular edema, bilateral |  |  |  |  |  |  |  |  |  |
|  | E103219 | Type 1 diabetes mellitus with mild nonproliferative diabetic retinopathy with macular edema, unspecified eye |  |  |  |  |  |  |  |  |  |
|  | E103291 | Type 1 diabetes mellitus with mild nonproliferative diabetic retinopathy without macular edema, right eye |  |  |  |  |  |  |  |  |  |
|  | E103292 | Type 1 diabetes mellitus with mild nonproliferative diabetic retinopathy without macular edema, left eye |  |  |  |  |  |  |  |  |  |
|  | E103293 | Type 1 diabetes mellitus with mild nonproliferative diabetic retinopathy without macular edema, bilateral |  |  |  |  |  |  |  |  |  |
|  | E103299 | Type 1 diabetes mellitus with mild nonproliferative diabetic retinopathy without macular edema, unspecified eye |  |  |  |  |  |  |  |  |  |
|  | E103311 | Type 1 diabetes mellitus with moderate nonproliferative diabetic retinopathy with macular edema, right eye |  |  |  |  |  |  |  |  |  |
|  | E103312 | Type 1 diabetes mellitus with moderate nonproliferative diabetic retinopathy with macular edema, left eye |  |  |  |  |  |  |  |  |  |
|  | E103313 | Type 1 diabetes mellitus with moderate nonproliferative diabetic retinopathy with macular edema, bilateral |  |  |  |  |  |  |  |  |  |
|  | E103319 | Type 1 diabetes mellitus with moderate nonproliferative diabetic retinopathy with macular edema, unspecified eye |  |  |  |  |  |  |  |  |  |
|  | E103391 | Type 1 diabetes mellitus with moderate nonproliferative diabetic retinopathy without macular edema, right eye |  |  |  |  |  |  |  |  |  |
|  | E103392 | Type 1 diabetes mellitus with moderate nonproliferative diabetic retinopathy without macular edema, left eye |  |  |  |  |  |  |  |  |  |
|  | E103393 | Type 1 diabetes mellitus with moderate nonproliferative diabetic retinopathy without macular edema, bilateral |  |  |  |  |  |  |  |  |  |
|  | E103399 | Type 1 diabetes mellitus with moderate nonproliferative diabetic retinopathy without macular edema, unspecified eye |  |  |  |  |  |  |  |  |  |
|  | E103411 | Type 1 diabetes mellitus with severe nonproliferative diabetic retinopathy with macular edema, right eye |  |  |  |  |  |  |  |  |  |
|  | E103412 | Type 1 diabetes mellitus with severe nonproliferative diabetic retinopathy with macular edema, left eye |  |  |  |  |  |  |  |  |  |
|  | E103413 | Type 1 diabetes mellitus with severe nonproliferative diabetic retinopathy with macular edema, bilateral |  |  |  |  |  |  |  |  |  |
|  | E103419 | Type 1 diabetes mellitus with severe nonproliferative diabetic retinopathy with macular edema, unspecified eye |  |  |  |  |  |  |  |  |  |
|  | E103491 | Type 1 diabetes mellitus with severe nonproliferative diabetic retinopathy without macular edema, right eye |  |  |  |  |  |  |  |  |  |
|  | E103492 | Type 1 diabetes mellitus with severe nonproliferative diabetic retinopathy without macular edema, left eye |  |  |  |  |  |  |  |  |  |
|  | E103493 | Type 1 diabetes mellitus with severe nonproliferative diabetic retinopathy without macular edema, bilateral |  |  |  |  |  |  |  |  |  |
|  | E103499 | Type 1 diabetes mellitus with severe nonproliferative diabetic retinopathy without macular edema, unspecified eye |  |  |  |  |  |  |  |  |  |
|  | E103511 | Type 1 diabetes mellitus with proliferative diabetic retinopathy with macular edema, right eye |  |  |  |  |  |  |  |  |  |
|  | E103512 | Type 1 diabetes mellitus with proliferative diabetic retinopathy with macular edema, left eye |  |  |  |  |  |  |  |  |  |
|  | E103513 | Type 1 diabetes mellitus with proliferative diabetic retinopathy with macular edema, bilateral |  |  |  |  |  |  |  |  |  |
|  | E103519 | Type 1 diabetes mellitus with proliferative diabetic retinopathy with macular edema, unspecified eye |  |  |  |  |  |  |  |  |  |
|  | E103521 | Type 1 diabetes mellitus with proliferative diabetic retinopathy with traction retinal detachment involving the macula, right eye |  |  |  |  |  |  |  |  |  |
|  | E103522 | Type 1 diabetes mellitus with proliferative diabetic retinopathy with traction retinal detachment involving the macula, left eye |  |  |  |  |  |  |  |  |  |
|  | E103523 | Type 1 diabetes mellitus with proliferative diabetic retinopathy with traction retinal detachment involving the macula, bilateral |  |  |  |  |  |  |  |  |  |
|  | E103529 | Type 1 diabetes mellitus with proliferative diabetic retinopathy with traction retinal detachment involving the macula, unspecified eye |  |  |  |  |  |  |  |  |  |
|  | E103531 | Type 1 diabetes mellitus with proliferative diabetic retinopathy with traction retinal detachment not involving the macula, right eye |  |  |  |  |  |  |  |  |  |
|  | E103532 | Type 1 diabetes mellitus with proliferative diabetic retinopathy with traction retinal detachment not involving the macula, left eye |  |  |  |  |  |  |  |  |  |
|  | E103533 | Type 1 diabetes mellitus with proliferative diabetic retinopathy with traction retinal detachment not involving the macula, bilateral |  |  |  |  |  |  |  |  |  |
|  | E103539 | Type 1 diabetes mellitus with proliferative diabetic retinopathy with traction retinal detachment not involving the macula, unspecified eye |  |  |  |  |  |  |  |  |  |
|  | E103541 | Type 1 diabetes mellitus with proliferative diabetic retinopathy with combined traction retinal detachment and rhegmatogenous retinal detachment, right eye |  |  |  |  |  |  |  |  |  |
|  | E103542 | Type 1 diabetes mellitus with proliferative diabetic retinopathy with combined traction retinal detachment and rhegmatogenous retinal detachment, left eye |  |  |  |  |  |  |  |  |  |
|  | E103543 | Type 1 diabetes mellitus with proliferative diabetic retinopathy with combined traction retinal detachment and rhegmatogenous retinal detachment, bilateral |  |  |  |  |  |  |  |  |  |
|  | E103549 | Type 1 diabetes mellitus with proliferative diabetic retinopathy with combined traction retinal detachment and rhegmatogenous retinal detachment, unspecified eye |  |  |  |  |  |  |  |  |  |
|  | E103551 | Type 1 diabetes mellitus with stable proliferative diabetic retinopathy, right eye |  |  |  |  |  |  |  |  |  |
|  | E103552 | Type 1 diabetes mellitus with stable proliferative diabetic retinopathy, left eye |  |  |  |  |  |  |  |  |  |
|  | E103553 | Type 1 diabetes mellitus with stable proliferative diabetic retinopathy, bilateral |  |  |  |  |  |  |  |  |  |
|  | E103559 | Type 1 diabetes mellitus with stable proliferative diabetic retinopathy, unspecified eye |  |  |  |  |  |  |  |  |  |
|  | E103591 | Type 1 diabetes mellitus with proliferative diabetic retinopathy without macular edema, right eye |  |  |  |  |  |  |  |  |  |
|  | E103592 | Type 1 diabetes mellitus with proliferative diabetic retinopathy without macular edema, left eye |  |  |  |  |  |  |  |  |  |
|  | E103593 | Type 1 diabetes mellitus with proliferative diabetic retinopathy without macular edema, bilateral |  |  |  |  |  |  |  |  |  |
|  | E103599 | Type 1 diabetes mellitus with proliferative diabetic retinopathy without macular edema, unspecified eye |  |  |  |  |  |  |  |  |  |
|  | E1036 | Type 1 diabetes mellitus with diabetic cataract |  |  |  |  |  |  |  |  |  |
|  | E1037X1 | Type 1 diabetes mellitus with diabetic macular edema, resolved following treatment, right eye |  |  |  |  |  |  |  |  |  |
|  | E1037X2 | Type 1 diabetes mellitus with diabetic macular edema, resolved following treatment, left eye |  |  |  |  |  |  |  |  |  |
|  | E1037X3 | Type 1 diabetes mellitus with diabetic macular edema, resolved following treatment, bilateral |  |  |  |  |  |  |  |  |  |
|  | E1037X9 | Type 1 diabetes mellitus with diabetic macular edema, resolved following treatment, unspecified eye |  |  |  |  |  |  |  |  |  |
|  | E1039 | Type 1 diabetes mellitus with other diabetic ophthalmic complication |  |  |  |  |  |  |  |  |  |
|  | E1040 | Type 1 diabetes mellitus with diabetic neuropathy, unspecified |  |  |  |  |  |  |  |  |  |
|  | E1041 | Type 1 diabetes mellitus with diabetic mononeuropathy |  |  |  |  |  |  |  |  |  |
|  | E1042 | Type 1 diabetes mellitus with diabetic polyneuropathy |  |  |  |  |  |  |  |  |  |
|  | E1043 | Type 1 diabetes mellitus with diabetic autonomic (poly)neuropathy |  |  |  |  |  |  |  |  |  |
|  | E1044 | Type 1 diabetes mellitus with diabetic amyotrophy |  |  |  |  |  |  |  |  |  |
|  | E1049 | Type 1 diabetes mellitus with other diabetic neurological complication |  |  |  |  |  |  |  |  |  |
|  | E1051 | Type 1 diabetes mellitus with diabetic peripheral angiopathy without gangrene |  |  |  |  |  |  |  |  |  |
|  | E1052 | Type 1 diabetes mellitus with diabetic peripheral angiopathy with gangrene |  |  |  |  |  |  |  |  |  |
|  | E1059 | Type 1 diabetes mellitus with other circulatory complications |  |  |  |  |  |  |  |  |  |
|  | E10610 | Type 1 diabetes mellitus with diabetic neuropathic arthropathy |  |  |  |  |  |  |  |  |  |
|  | E10618 | Type 1 diabetes mellitus with other diabetic arthropathy |  |  |  |  |  |  |  |  |  |
|  | E10620 | Type 1 diabetes mellitus with diabetic dermatitis |  |  |  |  |  |  |  |  |  |
|  | E10621 | Type 1 diabetes mellitus with foot ulcer |  |  |  |  |  |  |  |  |  |
|  | E10622 | Type 1 diabetes mellitus with other skin ulcer |  |  |  |  |  |  |  |  |  |
|  | E10628 | Type 1 diabetes mellitus with other skin complications |  |  |  |  |  |  |  |  |  |
|  | E10630 | Type 1 diabetes mellitus with periodontal disease |  |  |  |  |  |  |  |  |  |
|  | E10638 | Type 1 diabetes mellitus with other oral complications |  |  |  |  |  |  |  |  |  |
|  | E10641 | Type 1 diabetes mellitus with hypoglycemia with coma |  |  |  |  |  |  |  |  |  |
|  | E10649 | Type 1 diabetes mellitus with hypoglycemia without coma |  |  |  |  |  |  |  |  |  |
|  | E1065 | Type 1 diabetes mellitus with hyperglycemia |  |  |  |  |  |  |  |  |  |
|  | E1069 | Type 1 diabetes mellitus with other specified complication |  |  |  |  |  |  |  |  |  |
|  | E108 | Type 1 diabetes mellitus with unspecified complications |  |  |  |  |  |  |  |  |  |
|  | E1100 | Type 2 diabetes mellitus with hyperosmolarity without nonketotic hyperglycemic-hyperosmolar coma (NKHHC) |  |  |  |  |  |  |  |  |  |
|  | E1101 | Type 2 diabetes mellitus with hyperosmolarity with coma |  |  |  |  |  |  |  |  |  |
|  | E1110 | Type 2 diabetes mellitus with ketoacidosis without coma |  |  |  |  |  |  |  |  |  |
|  | E1111 | Type 2 diabetes mellitus with ketoacidosis with coma |  |  |  |  |  |  |  |  |  |
|  | E1121 | Type 2 diabetes mellitus with diabetic nephropathy |  |  |  |  |  |  |  |  |  |
|  | E1122 | Type 2 diabetes mellitus with diabetic chronic kidney disease |  |  |  |  |  |  |  |  |  |
|  | E1129 | Type 2 diabetes mellitus with other diabetic kidney complication |  |  |  |  |  |  |  |  |  |
|  | E11311 | Type 2 diabetes mellitus with unspecified diabetic retinopathy with macular edema |  |  |  |  |  |  |  |  |  |
|  | E11319 | Type 2 diabetes mellitus with unspecified diabetic retinopathy without macular edema |  |  |  |  |  |  |  |  |  |
|  | E113211 | Type 2 diabetes mellitus with mild nonproliferative diabetic retinopathy with macular edema, right eye |  |  |  |  |  |  |  |  |  |
|  | E113212 | Type 2 diabetes mellitus with mild nonproliferative diabetic retinopathy with macular edema, left eye |  |  |  |  |  |  |  |  |  |
|  | E113213 | Type 2 diabetes mellitus with mild nonproliferative diabetic retinopathy with macular edema, bilateral |  |  |  |  |  |  |  |  |  |
|  | E113219 | Type 2 diabetes mellitus with mild nonproliferative diabetic retinopathy with macular edema, unspecified eye |  |  |  |  |  |  |  |  |  |
|  | E113291 | Type 2 diabetes mellitus with mild nonproliferative diabetic retinopathy without macular edema, right eye |  |  |  |  |  |  |  |  |  |
|  | E113292 | Type 2 diabetes mellitus with mild nonproliferative diabetic retinopathy without macular edema, left eye |  |  |  |  |  |  |  |  |  |
|  | E113293 | Type 2 diabetes mellitus with mild nonproliferative diabetic retinopathy without macular edema, bilateral |  |  |  |  |  |  |  |  |  |
|  | E113299 | Type 2 diabetes mellitus with mild nonproliferative diabetic retinopathy without macular edema, unspecified eye |  |  |  |  |  |  |  |  |  |
|  | E113311 | Type 2 diabetes mellitus with moderate nonproliferative diabetic retinopathy with macular edema, right eye |  |  |  |  |  |  |  |  |  |
|  | E113312 | Type 2 diabetes mellitus with moderate nonproliferative diabetic retinopathy with macular edema, left eye |  |  |  |  |  |  |  |  |  |
|  | E113313 | Type 2 diabetes mellitus with moderate nonproliferative diabetic retinopathy with macular edema, bilateral |  |  |  |  |  |  |  |  |  |
|  | E113319 | Type 2 diabetes mellitus with moderate nonproliferative diabetic retinopathy with macular edema, unspecified eye |  |  |  |  |  |  |  |  |  |
|  | E113391 | Type 2 diabetes mellitus with moderate nonproliferative diabetic retinopathy without macular edema, right eye |  |  |  |  |  |  |  |  |  |
|  | E113392 | Type 2 diabetes mellitus with moderate nonproliferative diabetic retinopathy without macular edema, left eye |  |  |  |  |  |  |  |  |  |
|  | E113393 | Type 2 diabetes mellitus with moderate nonproliferative diabetic retinopathy without macular edema, bilateral |  |  |  |  |  |  |  |  |  |
|  | E113399 | Type 2 diabetes mellitus with moderate nonproliferative diabetic retinopathy without macular edema, unspecified eye |  |  |  |  |  |  |  |  |  |
|  | E113411 | Type 2 diabetes mellitus with severe nonproliferative diabetic retinopathy with macular edema, right eye |  |  |  |  |  |  |  |  |  |
|  | E113412 | Type 2 diabetes mellitus with severe nonproliferative diabetic retinopathy with macular edema, left eye |  |  |  |  |  |  |  |  |  |
|  | E113413 | Type 2 diabetes mellitus with severe nonproliferative diabetic retinopathy with macular edema, bilateral |  |  |  |  |  |  |  |  |  |
|  | E113419 | Type 2 diabetes mellitus with severe nonproliferative diabetic retinopathy with macular edema, unspecified eye |  |  |  |  |  |  |  |  |  |
|  | E113491 | Type 2 diabetes mellitus with severe nonproliferative diabetic retinopathy without macular edema, right eye |  |  |  |  |  |  |  |  |  |
|  | E113492 | Type 2 diabetes mellitus with severe nonproliferative diabetic retinopathy without macular edema, left eye |  |  |  |  |  |  |  |  |  |
|  | E113493 | Type 2 diabetes mellitus with severe nonproliferative diabetic retinopathy without macular edema, bilateral |  |  |  |  |  |  |  |  |  |
|  | E113499 | Type 2 diabetes mellitus with severe nonproliferative diabetic retinopathy without macular edema, unspecified eye |  |  |  |  |  |  |  |  |  |
|  | E113511 | Type 2 diabetes mellitus with proliferative diabetic retinopathy with macular edema, right eye |  |  |  |  |  |  |  |  |  |
|  | E113512 | Type 2 diabetes mellitus with proliferative diabetic retinopathy with macular edema, left eye |  |  |  |  |  |  |  |  |  |
|  | E113513 | Type 2 diabetes mellitus with proliferative diabetic retinopathy with macular edema, bilateral |  |  |  |  |  |  |  |  |  |
|  | E113519 | Type 2 diabetes mellitus with proliferative diabetic retinopathy with macular edema, unspecified eye |  |  |  |  |  |  |  |  |  |
|  | E113521 | Type 2 diabetes mellitus with proliferative diabetic retinopathy with traction retinal detachment involving the macula, right eye |  |  |  |  |  |  |  |  |  |
|  | E113522 | Type 2 diabetes mellitus with proliferative diabetic retinopathy with traction retinal detachment involving the macula, left eye |  |  |  |  |  |  |  |  |  |
|  | E113523 | Type 2 diabetes mellitus with proliferative diabetic retinopathy with traction retinal detachment involving the macula, bilateral |  |  |  |  |  |  |  |  |  |
|  | E113529 | Type 2 diabetes mellitus with proliferative diabetic retinopathy with traction retinal detachment involving the macula, unspecified eye |  |  |  |  |  |  |  |  |  |
|  | E113531 | Type 2 diabetes mellitus with proliferative diabetic retinopathy with traction retinal detachment not involving the macula, right eye |  |  |  |  |  |  |  |  |  |
|  | E113532 | Type 2 diabetes mellitus with proliferative diabetic retinopathy with traction retinal detachment not involving the macula, left eye |  |  |  |  |  |  |  |  |  |
|  | E113533 | Type 2 diabetes mellitus with proliferative diabetic retinopathy with traction retinal detachment not involving the macula, bilateral |  |  |  |  |  |  |  |  |  |
|  | E113539 | Type 2 diabetes mellitus with proliferative diabetic retinopathy with traction retinal detachment not involving the macula, unspecified eye |  |  |  |  |  |  |  |  |  |
|  | E113541 | Type 2 diabetes mellitus with proliferative diabetic retinopathy with combined traction retinal detachment and rhegmatogenous retinal detachment, right eye |  |  |  |  |  |  |  |  |  |
|  | E113542 | Type 2 diabetes mellitus with proliferative diabetic retinopathy with combined traction retinal detachment and rhegmatogenous retinal detachment, left eye |  |  |  |  |  |  |  |  |  |
|  | E113543 | Type 2 diabetes mellitus with proliferative diabetic retinopathy with combined traction retinal detachment and rhegmatogenous retinal detachment, bilateral |  |  |  |  |  |  |  |  |  |
|  | E113549 | Type 2 diabetes mellitus with proliferative diabetic retinopathy with combined traction retinal detachment and rhegmatogenous retinal detachment, unspecified eye |  |  |  |  |  |  |  |  |  |
|  | E113551 | Type 2 diabetes mellitus with stable proliferative diabetic retinopathy, right eye |  |  |  |  |  |  |  |  |  |
|  | E113552 | Type 2 diabetes mellitus with stable proliferative diabetic retinopathy, left eye |  |  |  |  |  |  |  |  |  |
|  | E113553 | Type 2 diabetes mellitus with stable proliferative diabetic retinopathy, bilateral |  |  |  |  |  |  |  |  |  |
|  | E113559 | Type 2 diabetes mellitus with stable proliferative diabetic retinopathy, unspecified eye |  |  |  |  |  |  |  |  |  |
|  | E113591 | Type 2 diabetes mellitus with proliferative diabetic retinopathy without macular edema, right eye |  |  |  |  |  |  |  |  |  |
|  | E169 | Disorder of pancreatic internal secretion, unspecified |  |  |  |  |  |  |  |  |  |
|  | E113592 | Type 2 diabetes mellitus with proliferative diabetic retinopathy without macular edema, left eye |  |  |  |  |  |  |  |  |  |
|  | E113593 | Type 2 diabetes mellitus with proliferative diabetic retinopathy without macular edema, bilateral |  |  |  |  |  |  |  |  |  |
|  | E113599 | Type 2 diabetes mellitus with proliferative diabetic retinopathy without macular edema, unspecified eye |  |  |  |  |  |  |  |  |  |
|  | E1136 | Type 2 diabetes mellitus with diabetic cataract |  |  |  |  |  |  |  |  |  |
|  | E1137X1 | Type 2 diabetes mellitus with diabetic macular edema, resolved following treatment, right eye |  |  |  |  |  |  |  |  |  |
|  | E1137X2 | Type 2 diabetes mellitus with diabetic macular edema, resolved following treatment, left eye |  |  |  |  |  |  |  |  |  |
|  | E1137X3 | Type 2 diabetes mellitus with diabetic macular edema, resolved following treatment, bilateral |  |  |  |  |  |  |  |  |  |
|  | E1137X9 | Type 2 diabetes mellitus with diabetic macular edema, resolved following treatment, unspecified eye |  |  |  |  |  |  |  |  |  |
|  | E1139 | Type 2 diabetes mellitus with other diabetic ophthalmic complication |  |  |  |  |  |  |  |  |  |
|  | E1140 | Type 2 diabetes mellitus with diabetic neuropathy, unspecified |  |  |  |  |  |  |  |  |  |
|  | E1141 | Type 2 diabetes mellitus with diabetic mononeuropathy |  |  |  |  |  |  |  |  |  |
|  | E1142 | Type 2 diabetes mellitus with diabetic polyneuropathy |  |  |  |  |  |  |  |  |  |
|  | E1143 | Type 2 diabetes mellitus with diabetic autonomic (poly)neuropathy |  |  |  |  |  |  |  |  |  |
|  | E1144 | Type 2 diabetes mellitus with diabetic amyotrophy |  |  |  |  |  |  |  |  |  |
|  | E1149 | Type 2 diabetes mellitus with other diabetic neurological complication |  |  |  |  |  |  |  |  |  |
|  | E1151 | Type 2 diabetes mellitus with diabetic peripheral angiopathy without gangrene |  |  |  |  |  |  |  |  |  |
|  | E1152 | Type 2 diabetes mellitus with diabetic peripheral angiopathy with gangrene |  |  |  |  |  |  |  |  |  |
|  | E1159 | Type 2 diabetes mellitus with other circulatory complications |  |  |  |  |  |  |  |  |  |
|  | E11610 | Type 2 diabetes mellitus with diabetic neuropathic arthropathy |  |  |  |  |  |  |  |  |  |
|  | E11618 | Type 2 diabetes mellitus with other diabetic arthropathy |  |  |  |  |  |  |  |  |  |
|  | E11620 | Type 2 diabetes mellitus with diabetic dermatitis |  |  |  |  |  |  |  |  |  |
|  | E11621 | Type 2 diabetes mellitus with foot ulcer |  |  |  |  |  |  |  |  |  |
|  | E11622 | Type 2 diabetes mellitus with other skin ulcer |  |  |  |  |  |  |  |  |  |
|  | E11628 | Type 2 diabetes mellitus with other skin complications |  |  |  |  |  |  |  |  |  |
|  | E11630 | Type 2 diabetes mellitus with periodontal disease |  |  |  |  |  |  |  |  |  |
|  | E11638 | Type 2 diabetes mellitus with other oral complications |  |  |  |  |  |  |  |  |  |
|  | E11641 | Type 2 diabetes mellitus with hypoglycemia with coma |  |  |  |  |  |  |  |  |  |
|  | E11649 | Type 2 diabetes mellitus with hypoglycemia without coma |  |  |  |  |  |  |  |  |  |
|  | E1165 | Type 2 diabetes mellitus with hyperglycemia |  |  |  |  |  |  |  |  |  |
|  | E1169 | Type 2 diabetes mellitus with other specified complication |  |  |  |  |  |  |  |  |  |
|  | E118 | Type 2 diabetes mellitus with unspecified complications |  |  |  |  |  |  |  |  |  |
|  | E119 | Type 2 diabetes mellitus without complications |  |  |  |  |  |  |  |  |  |
|  | E1300 | Other specified diabetes mellitus with hyperosmolarity without nonketotic hyperglycemic-hyperosmolar coma (NKHHC) |  |  |  |  |  |  |  |  |  |
|  | E1301 | Other specified diabetes mellitus with hyperosmolarity with coma |  |  |  |  |  |  |  |  |  |
|  | E1310 | Other specified diabetes mellitus with ketoacidosis without coma |  |  |  |  |  |  |  |  |  |
|  | E1311 | Other specified diabetes mellitus with ketoacidosis with coma |  |  |  |  |  |  |  |  |  |
|  | E1321 | Other specified diabetes mellitus with diabetic nephropathy |  |  |  |  |  |  |  |  |  |
|  | E1322 | Other specified diabetes mellitus with diabetic chronic kidney disease |  |  |  |  |  |  |  |  |  |
|  | E1329 | Other specified diabetes mellitus with other diabetic kidney complication |  |  |  |  |  |  |  |  |  |
|  | E13311 | Other specified diabetes mellitus with unspecified diabetic retinopathy with macular edema |  |  |  |  |  |  |  |  |  |
|  | E13319 | Other specified diabetes mellitus with unspecified diabetic retinopathy without macular edema |  |  |  |  |  |  |  |  |  |
|  | E133211 | Other specified diabetes mellitus with mild nonproliferative diabetic retinopathy with macular edema, right eye |  |  |  |  |  |  |  |  |  |
|  | E133212 | Other specified diabetes mellitus with mild nonproliferative diabetic retinopathy with macular edema, left eye |  |  |  |  |  |  |  |  |  |
|  | E133213 | Other specified diabetes mellitus with mild nonproliferative diabetic retinopathy with macular edema, bilateral |  |  |  |  |  |  |  |  |  |
|  | E133219 | Other specified diabetes mellitus with mild nonproliferative diabetic retinopathy with macular edema, unspecified eye |  |  |  |  |  |  |  |  |  |
|  | E133291 | Other specified diabetes mellitus with mild nonproliferative diabetic retinopathy without macular edema, right eye |  |  |  |  |  |  |  |  |  |
|  | E133292 | Other specified diabetes mellitus with mild nonproliferative diabetic retinopathy without macular edema, left eye |  |  |  |  |  |  |  |  |  |
|  | E133293 | Other specified diabetes mellitus with mild nonproliferative diabetic retinopathy without macular edema, bilateral |  |  |  |  |  |  |  |  |  |
|  | E133299 | Other specified diabetes mellitus with mild nonproliferative diabetic retinopathy without macular edema, unspecified eye |  |  |  |  |  |  |  |  |  |
|  | E133311 | Other specified diabetes mellitus with moderate nonproliferative diabetic retinopathy with macular edema, right eye |  |  |  |  |  |  |  |  |  |
|  | E133312 | Other specified diabetes mellitus with moderate nonproliferative diabetic retinopathy with macular edema, left eye |  |  |  |  |  |  |  |  |  |
|  | E133313 | Other specified diabetes mellitus with moderate nonproliferative diabetic retinopathy with macular edema, bilateral |  |  |  |  |  |  |  |  |  |
|  | E133319 | Other specified diabetes mellitus with moderate nonproliferative diabetic retinopathy with macular edema, unspecified eye |  |  |  |  |  |  |  |  |  |
|  | E133391 | Other specified diabetes mellitus with moderate nonproliferative diabetic retinopathy without macular edema, right eye |  |  |  |  |  |  |  |  |  |
|  | E133392 | Other specified diabetes mellitus with moderate nonproliferative diabetic retinopathy without macular edema, left eye |  |  |  |  |  |  |  |  |  |
|  | E133393 | Other specified diabetes mellitus with moderate nonproliferative diabetic retinopathy without macular edema, bilateral |  |  |  |  |  |  |  |  |  |
|  | E133399 | Other specified diabetes mellitus with moderate nonproliferative diabetic retinopathy without macular edema, unspecified eye |  |  |  |  |  |  |  |  |  |
|  | E133411 | Other specified diabetes mellitus with severe nonproliferative diabetic retinopathy with macular edema, right eye |  |  |  |  |  |  |  |  |  |
|  | E133412 | Other specified diabetes mellitus with severe nonproliferative diabetic retinopathy with macular edema, left eye |  |  |  |  |  |  |  |  |  |
|  | E133413 | Other specified diabetes mellitus with severe nonproliferative diabetic retinopathy with macular edema, bilateral |  |  |  |  |  |  |  |  |  |
|  | E133419 | Other specified diabetes mellitus with severe nonproliferative diabetic retinopathy with macular edema, unspecified eye |  |  |  |  |  |  |  |  |  |
|  | E133491 | Other specified diabetes mellitus with severe nonproliferative diabetic retinopathy without macular edema, right eye |  |  |  |  |  |  |  |  |  |
|  | E133492 | Other specified diabetes mellitus with severe nonproliferative diabetic retinopathy without macular edema, left eye |  |  |  |  |  |  |  |  |  |
|  | E133493 | Other specified diabetes mellitus with severe nonproliferative diabetic retinopathy without macular edema, bilateral |  |  |  |  |  |  |  |  |  |
|  | E133499 | Other specified diabetes mellitus with severe nonproliferative diabetic retinopathy without macular edema, unspecified eye |  |  |  |  |  |  |  |  |  |
|  | E133511 | Other specified diabetes mellitus with proliferative diabetic retinopathy with macular edema, right eye |  |  |  |  |  |  |  |  |  |
|  | E133512 | Other specified diabetes mellitus with proliferative diabetic retinopathy with macular edema, left eye |  |  |  |  |  |  |  |  |  |
|  | E133513 | Other specified diabetes mellitus with proliferative diabetic retinopathy with macular edema, bilateral |  |  |  |  |  |  |  |  |  |
|  | E133519 | Other specified diabetes mellitus with proliferative diabetic retinopathy with macular edema, unspecified eye |  |  |  |  |  |  |  |  |  |
|  | E133521 | Other specified diabetes mellitus with proliferative diabetic retinopathy with traction retinal detachment involving the macula, right eye |  |  |  |  |  |  |  |  |  |
|  | E133522 | Other specified diabetes mellitus with proliferative diabetic retinopathy with traction retinal detachment involving the macula, left eye |  |  |  |  |  |  |  |  |  |
|  | E133523 | Other specified diabetes mellitus with proliferative diabetic retinopathy with traction retinal detachment involving the macula, bilateral |  |  |  |  |  |  |  |  |  |
|  | E133529 | Other specified diabetes mellitus with proliferative diabetic retinopathy with traction retinal detachment involving the macula, unspecified eye |  |  |  |  |  |  |  |  |  |
|  | E133531 | Other specified diabetes mellitus with proliferative diabetic retinopathy with traction retinal detachment not involving the macula, right eye |  |  |  |  |  |  |  |  |  |
|  | E133532 | Other specified diabetes mellitus with proliferative diabetic retinopathy with traction retinal detachment not involving the macula, left eye |  |  |  |  |  |  |  |  |  |
|  | E133533 | Other specified diabetes mellitus with proliferative diabetic retinopathy with traction retinal detachment not involving the macula, bilateral |  |  |  |  |  |  |  |  |  |
|  | E133539 | Other specified diabetes mellitus with proliferative diabetic retinopathy with traction retinal detachment not involving the macula, unspecified eye |  |  |  |  |  |  |  |  |  |
|  | E133541 | Other specified diabetes mellitus with proliferative diabetic retinopathy with combined traction retinal detachment and rhegmatogenous retinal detachment, right eye |  |  |  |  |  |  |  |  |  |
|  | E133542 | Other specified diabetes mellitus with proliferative diabetic retinopathy with combined traction retinal detachment and rhegmatogenous retinal detachment, left eye |  |  |  |  |  |  |  |  |  |
|  | E133543 | Other specified diabetes mellitus with proliferative diabetic retinopathy with combined traction retinal detachment and rhegmatogenous retinal detachment, bilateral |  |  |  |  |  |  |  |  |  |
|  | E133549 | Other specified diabetes mellitus with proliferative diabetic retinopathy with combined traction retinal detachment and rhegmatogenous retinal detachment, unspecified eye |  |  |  |  |  |  |  |  |  |
|  | E133551 | Other specified diabetes mellitus with stable proliferative diabetic retinopathy, right eye |  |  |  |  |  |  |  |  |  |
|  | E133552 | Other specified diabetes mellitus with stable proliferative diabetic retinopathy, left eye |  |  |  |  |  |  |  |  |  |
|  | E133553 | Other specified diabetes mellitus with stable proliferative diabetic retinopathy, bilateral |  |  |  |  |  |  |  |  |  |
|  | E133559 | Other specified diabetes mellitus with stable proliferative diabetic retinopathy, unspecified eye |  |  |  |  |  |  |  |  |  |
|  | E133591 | Other specified diabetes mellitus with proliferative diabetic retinopathy without macular edema, right eye |  |  |  |  |  |  |  |  |  |
|  | E133592 | Other specified diabetes mellitus with proliferative diabetic retinopathy without macular edema, left eye |  |  |  |  |  |  |  |  |  |
|  | E133593 | Other specified diabetes mellitus with proliferative diabetic retinopathy without macular edema, bilateral |  |  |  |  |  |  |  |  |  |
|  | E133599 | Other specified diabetes mellitus with proliferative diabetic retinopathy without macular edema, unspecified eye |  |  |  |  |  |  |  |  |  |
|  | E1336 | Other specified diabetes mellitus with diabetic cataract |  |  |  |  |  |  |  |  |  |
|  | E1337X1 | Other specified diabetes mellitus with diabetic macular edema, resolved following treatment, right eye |  |  |  |  |  |  |  |  |  |
|  | E1337X2 | Other specified diabetes mellitus with diabetic macular edema, resolved following treatment, left eye |  |  |  |  |  |  |  |  |  |
|  | E1337X3 | Other specified diabetes mellitus with diabetic macular edema, resolved following treatment, bilateral |  |  |  |  |  |  |  |  |  |
|  | E1337X9 | Other specified diabetes mellitus with diabetic macular edema, resolved following treatment, unspecified eye |  |  |  |  |  |  |  |  |  |
|  | E1339 | Other specified diabetes mellitus with other diabetic ophthalmic complication |  |  |  |  |  |  |  |  |  |
|  | E1340 | Other specified diabetes mellitus with diabetic neuropathy, unspecified |  |  |  |  |  |  |  |  |  |
|  | E1341 | Other specified diabetes mellitus with diabetic mononeuropathy |  |  |  |  |  |  |  |  |  |
|  | E1342 | Other specified diabetes mellitus with diabetic polyneuropathy |  |  |  |  |  |  |  |  |  |
|  | E1343 | Other specified diabetes mellitus with diabetic autonomic (poly)neuropathy |  |  |  |  |  |  |  |  |  |
|  | E1344 | Other specified diabetes mellitus with diabetic amyotrophy |  |  |  |  |  |  |  |  |  |
|  | E1349 | Other specified diabetes mellitus with other diabetic neurological complication |  |  |  |  |  |  |  |  |  |
|  | E1351 | Other specified diabetes mellitus with diabetic peripheral angiopathy without gangrene |  |  |  |  |  |  |  |  |  |
|  | E1352 | Other specified diabetes mellitus with diabetic peripheral angiopathy with gangrene |  |  |  |  |  |  |  |  |  |
|  | E1359 | Other specified diabetes mellitus with other circulatory complications |  |  |  |  |  |  |  |  |  |
|  | E13610 | Other specified diabetes mellitus with diabetic neuropathic arthropathy |  |  |  |  |  |  |  |  |  |
|  | E13618 | Other specified diabetes mellitus with other diabetic arthropathy |  |  |  |  |  |  |  |  |  |
|  | E13620 | Other specified diabetes mellitus with diabetic dermatitis |  |  |  |  |  |  |  |  |  |
|  | E13621 | Other specified diabetes mellitus with foot ulcer |  |  |  |  |  |  |  |  |  |
|  | E13622 | Other specified diabetes mellitus with other skin ulcer |  |  |  |  |  |  |  |  |  |
|  | E13628 | Other specified diabetes mellitus with other skin complications |  |  |  |  |  |  |  |  |  |
|  | E13630 | Other specified diabetes mellitus with periodontal disease |  |  |  |  |  |  |  |  |  |
|  | E13638 | Other specified diabetes mellitus with other oral complications |  |  |  |  |  |  |  |  |  |
|  | E13641 | Other specified diabetes mellitus with hypoglycemia with coma |  |  |  |  |  |  |  |  |  |
|  | E13649 | Other specified diabetes mellitus with hypoglycemia without coma |  |  |  |  |  |  |  |  |  |
|  | E1365 | Other specified diabetes mellitus with hyperglycemia |  |  |  |  |  |  |  |  |  |
|  | E1369 | Other specified diabetes mellitus with other specified complication |  |  |  |  |  |  |  |  |  |
|  | E138 | Other specified diabetes mellitus with unspecified complications |  |  |  |  |  |  |  |  |  |
|  | E139 | Other specified diabetes mellitus without complications |  |  |  |  |  |  |  |  |  |
|  | E0900 | Drug or chemical induced diabetes mellitus with hyperosmolarity without nonketotic hyperglycemic-hyperosmolar coma (NKHHC) |  |  |  |  |  |  |  |  |  |
|  | E0901 | Drug or chemical induced diabetes mellitus with hyperosmolarity with coma |  |  |  |  |  |  |  |  |  |
|  | E0910 | Drug or chemical induced diabetes mellitus with ketoacidosis without coma |  |  |  |  |  |  |  |  |  |
|  | E0911 | Drug or chemical induced diabetes mellitus with ketoacidosis with coma |  |  |  |  |  |  |  |  |  |
|  | E0921 | Drug or chemical induced diabetes mellitus with diabetic nephropathy |  |  |  |  |  |  |  |  |  |
|  | E0922 | Drug or chemical induced diabetes mellitus with diabetic chronic kidney disease |  |  |  |  |  |  |  |  |  |
|  | E0929 | Drug or chemical induced diabetes mellitus with other diabetic kidney complication |  |  |  |  |  |  |  |  |  |
|  | E09311 | Drug or chemical induced diabetes mellitus with unspecified diabetic retinopathy with macular edema |  |  |  |  |  |  |  |  |  |
|  | E09319 | Drug or chemical induced diabetes mellitus with unspecified diabetic retinopathy without macular edema |  |  |  |  |  |  |  |  |  |
|  | E093211 | Drug or chemical induced diabetes mellitus with mild nonproliferative diabetic retinopathy with macular edema, right eye |  |  |  |  |  |  |  |  |  |
|  | E093212 | Drug or chemical induced diabetes mellitus with mild nonproliferative diabetic retinopathy with macular edema, left eye |  |  |  |  |  |  |  |  |  |
|  | E093213 | Drug or chemical induced diabetes mellitus with mild nonproliferative diabetic retinopathy with macular edema, bilateral |  |  |  |  |  |  |  |  |  |
|  | E093219 | Drug or chemical induced diabetes mellitus with mild nonproliferative diabetic retinopathy with macular edema, unspecified eye |  |  |  |  |  |  |  |  |  |
|  | E093291 | Drug or chemical induced diabetes mellitus with mild nonproliferative diabetic retinopathy without macular edema, right eye |  |  |  |  |  |  |  |  |  |
|  | E093292 | Drug or chemical induced diabetes mellitus with mild nonproliferative diabetic retinopathy without macular edema, left eye |  |  |  |  |  |  |  |  |  |
|  | E093293 | Drug or chemical induced diabetes mellitus with mild nonproliferative diabetic retinopathy without macular edema, bilateral |  |  |  |  |  |  |  |  |  |
|  | E093299 | Drug or chemical induced diabetes mellitus with mild nonproliferative diabetic retinopathy without macular edema, unspecified eye |  |  |  |  |  |  |  |  |  |
|  | E093311 | Drug or chemical induced diabetes mellitus with moderate nonproliferative diabetic retinopathy with macular edema, right eye |  |  |  |  |  |  |  |  |  |
|  | E093312 | Drug or chemical induced diabetes mellitus with moderate nonproliferative diabetic retinopathy with macular edema, left eye |  |  |  |  |  |  |  |  |  |
|  | E093313 | Drug or chemical induced diabetes mellitus with moderate nonproliferative diabetic retinopathy with macular edema, bilateral |  |  |  |  |  |  |  |  |  |
|  | E093319 | Drug or chemical induced diabetes mellitus with moderate nonproliferative diabetic retinopathy with macular edema, unspecified eye |  |  |  |  |  |  |  |  |  |
|  | E093391 | Drug or chemical induced diabetes mellitus with moderate nonproliferative diabetic retinopathy without macular edema, right eye |  |  |  |  |  |  |  |  |  |
|  | E093392 | Drug or chemical induced diabetes mellitus with moderate nonproliferative diabetic retinopathy without macular edema, left eye |  |  |  |  |  |  |  |  |  |
|  | E093393 | Drug or chemical induced diabetes mellitus with moderate nonproliferative diabetic retinopathy without macular edema, bilateral |  |  |  |  |  |  |  |  |  |
|  | E093399 | Drug or chemical induced diabetes mellitus with moderate nonproliferative diabetic retinopathy without macular edema, unspecified eye |  |  |  |  |  |  |  |  |  |
|  | E093411 | Drug or chemical induced diabetes mellitus with severe nonproliferative diabetic retinopathy with macular edema, right eye |  |  |  |  |  |  |  |  |  |
|  | E093412 | Drug or chemical induced diabetes mellitus with severe nonproliferative diabetic retinopathy with macular edema, left eye |  |  |  |  |  |  |  |  |  |
|  | E093413 | Drug or chemical induced diabetes mellitus with severe nonproliferative diabetic retinopathy with macular edema, bilateral |  |  |  |  |  |  |  |  |  |
|  | E093419 | Drug or chemical induced diabetes mellitus with severe nonproliferative diabetic retinopathy with macular edema, unspecified eye |  |  |  |  |  |  |  |  |  |
|  | E093491 | Drug or chemical induced diabetes mellitus with severe nonproliferative diabetic retinopathy without macular edema, right eye |  |  |  |  |  |  |  |  |  |
|  | E093492 | Drug or chemical induced diabetes mellitus with severe nonproliferative diabetic retinopathy without macular edema, left eye |  |  |  |  |  |  |  |  |  |
|  | E093493 | Drug or chemical induced diabetes mellitus with severe nonproliferative diabetic retinopathy without macular edema, bilateral |  |  |  |  |  |  |  |  |  |
|  | E093499 | Drug or chemical induced diabetes mellitus with severe nonproliferative diabetic retinopathy without macular edema, unspecified eye |  |  |  |  |  |  |  |  |  |
|  | E093511 | Drug or chemical induced diabetes mellitus with proliferative diabetic retinopathy with macular edema, right eye |  |  |  |  |  |  |  |  |  |
|  | E093512 | Drug or chemical induced diabetes mellitus with proliferative diabetic retinopathy with macular edema, left eye |  |  |  |  |  |  |  |  |  |
|  | E093513 | Drug or chemical induced diabetes mellitus with proliferative diabetic retinopathy with macular edema, bilateral |  |  |  |  |  |  |  |  |  |
|  | E093519 | Drug or chemical induced diabetes mellitus with proliferative diabetic retinopathy with macular edema, unspecified eye |  |  |  |  |  |  |  |  |  |
|  | E093521 | Drug or chemical induced diabetes mellitus with proliferative diabetic retinopathy with traction retinal detachment involving the macula, right eye |  |  |  |  |  |  |  |  |  |
|  | E093522 | Drug or chemical induced diabetes mellitus with proliferative diabetic retinopathy with traction retinal detachment involving the macula, left eye |  |  |  |  |  |  |  |  |  |
|  | E093523 | Drug or chemical induced diabetes mellitus with proliferative diabetic retinopathy with traction retinal detachment involving the macula, bilateral |  |  |  |  |  |  |  |  |  |
|  | E093529 | Drug or chemical induced diabetes mellitus with proliferative diabetic retinopathy with traction retinal detachment involving the macula, unspecified eye |  |  |  |  |  |  |  |  |  |
|  | E093531 | Drug or chemical induced diabetes mellitus with proliferative diabetic retinopathy with traction retinal detachment not involving the macula, right eye |  |  |  |  |  |  |  |  |  |
|  | E093532 | Drug or chemical induced diabetes mellitus with proliferative diabetic retinopathy with traction retinal detachment not involving the macula, left eye |  |  |  |  |  |  |  |  |  |
|  | E093533 | Drug or chemical induced diabetes mellitus with proliferative diabetic retinopathy with traction retinal detachment not involving the macula, bilateral |  |  |  |  |  |  |  |  |  |
|  | E093539 | Drug or chemical induced diabetes mellitus with proliferative diabetic retinopathy with traction retinal detachment not involving the macula, unspecified eye |  |  |  |  |  |  |  |  |  |
|  | E093541 | Drug or chemical induced diabetes mellitus with proliferative diabetic retinopathy with combined traction retinal detachment and rhegmatogenous retinal detachment, right eye |  |  |  |  |  |  |  |  |  |
|  | E093542 | Drug or chemical induced diabetes mellitus with proliferative diabetic retinopathy with combined traction retinal detachment and rhegmatogenous retinal detachment, left eye |  |  |  |  |  |  |  |  |  |
|  | E093543 | Drug or chemical induced diabetes mellitus with proliferative diabetic retinopathy with combined traction retinal detachment and rhegmatogenous retinal detachment, bilateral |  |  |  |  |  |  |  |  |  |
|  | E208 | Other hypoparathyroidism |  |  |  |  |  |  |  |  |  |
|  | E093549 | Drug or chemical induced diabetes mellitus with proliferative diabetic retinopathy with combined traction retinal detachment and rhegmatogenous retinal detachment, unspecified eye |  |  |  |  |  |  |  |  |  |
|  | E093551 | Drug or chemical induced diabetes mellitus with stable proliferative diabetic retinopathy, right eye |  |  |  |  |  |  |  |  |  |
|  | E093552 | Drug or chemical induced diabetes mellitus with stable proliferative diabetic retinopathy, left eye |  |  |  |  |  |  |  |  |  |
|  | E093553 | Drug or chemical induced diabetes mellitus with stable proliferative diabetic retinopathy, bilateral |  |  |  |  |  |  |  |  |  |
|  | E093559 | Drug or chemical induced diabetes mellitus with stable proliferative diabetic retinopathy, unspecified eye |  |  |  |  |  |  |  |  |  |
|  | E093591 | Drug or chemical induced diabetes mellitus with proliferative diabetic retinopathy without macular edema, right eye |  |  |  |  |  |  |  |  |  |
|  | E093592 | Drug or chemical induced diabetes mellitus with proliferative diabetic retinopathy without macular edema, left eye |  |  |  |  |  |  |  |  |  |
|  | E093593 | Drug or chemical induced diabetes mellitus with proliferative diabetic retinopathy without macular edema, bilateral |  |  |  |  |  |  |  |  |  |
|  | E093599 | Drug or chemical induced diabetes mellitus with proliferative diabetic retinopathy without macular edema, unspecified eye |  |  |  |  |  |  |  |  |  |
|  | E0936 | Drug or chemical induced diabetes mellitus with diabetic cataract |  |  |  |  |  |  |  |  |  |
|  | E0937X1 | Drug or chemical induced diabetes mellitus with diabetic macular edema, resolved following treatment, right eye |  |  |  |  |  |  |  |  |  |
|  | E0937X2 | Drug or chemical induced diabetes mellitus with diabetic macular edema, resolved following treatment, left eye |  |  |  |  |  |  |  |  |  |
|  | E0937X3 | Drug or chemical induced diabetes mellitus with diabetic macular edema, resolved following treatment, bilateral |  |  |  |  |  |  |  |  |  |
|  | E0937X9 | Drug or chemical induced diabetes mellitus with diabetic macular edema, resolved following treatment, unspecified eye |  |  |  |  |  |  |  |  |  |
|  | E0939 | Drug or chemical induced diabetes mellitus with other diabetic ophthalmic complication |  |  |  |  |  |  |  |  |  |
|  | E0940 | Drug or chemical induced diabetes mellitus with neurological complications with diabetic neuropathy, unspecified |  |  |  |  |  |  |  |  |  |
|  | E0941 | Drug or chemical induced diabetes mellitus with neurological complications with diabetic mononeuropathy |  |  |  |  |  |  |  |  |  |
|  | E0942 | Drug or chemical induced diabetes mellitus with neurological complications with diabetic polyneuropathy |  |  |  |  |  |  |  |  |  |
|  | E0943 | Drug or chemical induced diabetes mellitus with neurological complications with diabetic autonomic (poly)neuropathy |  |  |  |  |  |  |  |  |  |
|  | E0944 | Drug or chemical induced diabetes mellitus with neurological complications with diabetic amyotrophy |  |  |  |  |  |  |  |  |  |
|  | E0949 | Drug or chemical induced diabetes mellitus with neurological complications with other diabetic neurological complication |  |  |  |  |  |  |  |  |  |
|  | E0951 | Drug or chemical induced diabetes mellitus with diabetic peripheral angiopathy without gangrene |  |  |  |  |  |  |  |  |  |
|  | E0952 | Drug or chemical induced diabetes mellitus with diabetic peripheral angiopathy with gangrene |  |  |  |  |  |  |  |  |  |
|  | E0959 | Drug or chemical induced diabetes mellitus with other circulatory complications |  |  |  |  |  |  |  |  |  |
|  | E09610 | Drug or chemical induced diabetes mellitus with diabetic neuropathic arthropathy |  |  |  |  |  |  |  |  |  |
|  | E09618 | Drug or chemical induced diabetes mellitus with other diabetic arthropathy |  |  |  |  |  |  |  |  |  |
|  | E09620 | Drug or chemical induced diabetes mellitus with diabetic dermatitis |  |  |  |  |  |  |  |  |  |
|  | E09621 | Drug or chemical induced diabetes mellitus with foot ulcer |  |  |  |  |  |  |  |  |  |
|  | E09622 | Drug or chemical induced diabetes mellitus with other skin ulcer |  |  |  |  |  |  |  |  |  |
|  | E09628 | Drug or chemical induced diabetes mellitus with other skin complications |  |  |  |  |  |  |  |  |  |
|  | E09630 | Drug or chemical induced diabetes mellitus with periodontal disease |  |  |  |  |  |  |  |  |  |
|  | E09638 | Drug or chemical induced diabetes mellitus with other oral complications |  |  |  |  |  |  |  |  |  |
|  | E09641 | Drug or chemical induced diabetes mellitus with hypoglycemia with coma |  |  |  |  |  |  |  |  |  |
|  | E09649 | Drug or chemical induced diabetes mellitus with hypoglycemia without coma |  |  |  |  |  |  |  |  |  |
|  | E0965 | Drug or chemical induced diabetes mellitus with hyperglycemia |  |  |  |  |  |  |  |  |  |
|  | E0969 | Drug or chemical induced diabetes mellitus with other specified complication |  |  |  |  |  |  |  |  |  |
|  | E098 | Drug or chemical induced diabetes mellitus with unspecified complications |  |  |  |  |  |  |  |  |  |
|  | E099 | Drug or chemical induced diabetes mellitus without complications |  |  |  |  |  |  |  |  |  |
|  | E1010 | Type 1 diabetes mellitus with ketoacidosis without coma |  |  |  |  |  |  |  |  |  |
|  | E1011 | Type 1 diabetes mellitus with ketoacidosis with coma |  |  |  |  |  |  |  |  |  |
|  | E1021 | Type 1 diabetes mellitus with diabetic nephropathy |  |  |  |  |  |  |  |  |  |
|  | E1022 | Type 1 diabetes mellitus with diabetic chronic kidney disease |  |  |  |  |  |  |  |  |  |
|  | E1029 | Type 1 diabetes mellitus with other diabetic kidney complication |  |  |  |  |  |  |  |  |  |
|  | E10311 | Type 1 diabetes mellitus with unspecified diabetic retinopathy with macular edema |  |  |  |  |  |  |  |  |  |
|  | E10319 | Type 1 diabetes mellitus with unspecified diabetic retinopathy without macular edema |  |  |  |  |  |  |  |  |  |
|  | E103211 | Type 1 diabetes mellitus with mild nonproliferative diabetic retinopathy with macular edema, right eye |  |  |  |  |  |  |  |  |  |
|  | E103212 | Type 1 diabetes mellitus with mild nonproliferative diabetic retinopathy with macular edema, left eye |  |  |  |  |  |  |  |  |  |
|  | E103213 | Type 1 diabetes mellitus with mild nonproliferative diabetic retinopathy with macular edema, bilateral |  |  |  |  |  |  |  |  |  |
|  | E103219 | Type 1 diabetes mellitus with mild nonproliferative diabetic retinopathy with macular edema, unspecified eye |  |  |  |  |  |  |  |  |  |
|  | E103291 | Type 1 diabetes mellitus with mild nonproliferative diabetic retinopathy without macular edema, right eye |  |  |  |  |  |  |  |  |  |
|  | E103292 | Type 1 diabetes mellitus with mild nonproliferative diabetic retinopathy without macular edema, left eye |  |  |  |  |  |  |  |  |  |
|  | E103293 | Type 1 diabetes mellitus with mild nonproliferative diabetic retinopathy without macular edema, bilateral |  |  |  |  |  |  |  |  |  |
|  | E103299 | Type 1 diabetes mellitus with mild nonproliferative diabetic retinopathy without macular edema, unspecified eye |  |  |  |  |  |  |  |  |  |
|  | E103311 | Type 1 diabetes mellitus with moderate nonproliferative diabetic retinopathy with macular edema, right eye |  |  |  |  |  |  |  |  |  |
|  | E103312 | Type 1 diabetes mellitus with moderate nonproliferative diabetic retinopathy with macular edema, left eye |  |  |  |  |  |  |  |  |  |
|  | E103313 | Type 1 diabetes mellitus with moderate nonproliferative diabetic retinopathy with macular edema, bilateral |  |  |  |  |  |  |  |  |  |
|  | E103319 | Type 1 diabetes mellitus with moderate nonproliferative diabetic retinopathy with macular edema, unspecified eye |  |  |  |  |  |  |  |  |  |
|  | E103391 | Type 1 diabetes mellitus with moderate nonproliferative diabetic retinopathy without macular edema, right eye |  |  |  |  |  |  |  |  |  |
|  | E103392 | Type 1 diabetes mellitus with moderate nonproliferative diabetic retinopathy without macular edema, left eye |  |  |  |  |  |  |  |  |  |
|  | E103393 | Type 1 diabetes mellitus with moderate nonproliferative diabetic retinopathy without macular edema, bilateral |  |  |  |  |  |  |  |  |  |
|  | E103399 | Type 1 diabetes mellitus with moderate nonproliferative diabetic retinopathy without macular edema, unspecified eye |  |  |  |  |  |  |  |  |  |
|  | E103411 | Type 1 diabetes mellitus with severe nonproliferative diabetic retinopathy with macular edema, right eye |  |  |  |  |  |  |  |  |  |
|  | E103412 | Type 1 diabetes mellitus with severe nonproliferative diabetic retinopathy with macular edema, left eye |  |  |  |  |  |  |  |  |  |
|  | E103413 | Type 1 diabetes mellitus with severe nonproliferative diabetic retinopathy with macular edema, bilateral |  |  |  |  |  |  |  |  |  |
|  | E103419 | Type 1 diabetes mellitus with severe nonproliferative diabetic retinopathy with macular edema, unspecified eye |  |  |  |  |  |  |  |  |  |
|  | E103491 | Type 1 diabetes mellitus with severe nonproliferative diabetic retinopathy without macular edema, right eye |  |  |  |  |  |  |  |  |  |
|  | E103492 | Type 1 diabetes mellitus with severe nonproliferative diabetic retinopathy without macular edema, left eye |  |  |  |  |  |  |  |  |  |
|  | E103493 | Type 1 diabetes mellitus with severe nonproliferative diabetic retinopathy without macular edema, bilateral |  |  |  |  |  |  |  |  |  |
|  | E103499 | Type 1 diabetes mellitus with severe nonproliferative diabetic retinopathy without macular edema, unspecified eye |  |  |  |  |  |  |  |  |  |
|  | E103511 | Type 1 diabetes mellitus with proliferative diabetic retinopathy with macular edema, right eye |  |  |  |  |  |  |  |  |  |
|  | E103512 | Type 1 diabetes mellitus with proliferative diabetic retinopathy with macular edema, left eye |  |  |  |  |  |  |  |  |  |
|  | E103513 | Type 1 diabetes mellitus with proliferative diabetic retinopathy with macular edema, bilateral |  |  |  |  |  |  |  |  |  |
|  | E103519 | Type 1 diabetes mellitus with proliferative diabetic retinopathy with macular edema, unspecified eye |  |  |  |  |  |  |  |  |  |
|  | E103521 | Type 1 diabetes mellitus with proliferative diabetic retinopathy with traction retinal detachment involving the macula, right eye |  |  |  |  |  |  |  |  |  |
|  | E103522 | Type 1 diabetes mellitus with proliferative diabetic retinopathy with traction retinal detachment involving the macula, left eye |  |  |  |  |  |  |  |  |  |
|  | E103523 | Type 1 diabetes mellitus with proliferative diabetic retinopathy with traction retinal detachment involving the macula, bilateral |  |  |  |  |  |  |  |  |  |
|  | E103529 | Type 1 diabetes mellitus with proliferative diabetic retinopathy with traction retinal detachment involving the macula, unspecified eye |  |  |  |  |  |  |  |  |  |
|  | E103531 | Type 1 diabetes mellitus with proliferative diabetic retinopathy with traction retinal detachment not involving the macula, right eye |  |  |  |  |  |  |  |  |  |
|  | E103532 | Type 1 diabetes mellitus with proliferative diabetic retinopathy with traction retinal detachment not involving the macula, left eye |  |  |  |  |  |  |  |  |  |
|  | E103533 | Type 1 diabetes mellitus with proliferative diabetic retinopathy with traction retinal detachment not involving the macula, bilateral |  |  |  |  |  |  |  |  |  |
|  | E103539 | Type 1 diabetes mellitus with proliferative diabetic retinopathy with traction retinal detachment not involving the macula, unspecified eye |  |  |  |  |  |  |  |  |  |
|  | E103541 | Type 1 diabetes mellitus with proliferative diabetic retinopathy with combined traction retinal detachment and rhegmatogenous retinal detachment, right eye |  |  |  |  |  |  |  |  |  |
|  | E103542 | Type 1 diabetes mellitus with proliferative diabetic retinopathy with combined traction retinal detachment and rhegmatogenous retinal detachment, left eye |  |  |  |  |  |  |  |  |  |
|  | E103543 | Type 1 diabetes mellitus with proliferative diabetic retinopathy with combined traction retinal detachment and rhegmatogenous retinal detachment, bilateral |  |  |  |  |  |  |  |  |  |
|  | E103549 | Type 1 diabetes mellitus with proliferative diabetic retinopathy with combined traction retinal detachment and rhegmatogenous retinal detachment, unspecified eye |  |  |  |  |  |  |  |  |  |
|  | E103551 | Type 1 diabetes mellitus with stable proliferative diabetic retinopathy, right eye |  |  |  |  |  |  |  |  |  |
|  | E103552 | Type 1 diabetes mellitus with stable proliferative diabetic retinopathy, left eye |  |  |  |  |  |  |  |  |  |
|  | E103553 | Type 1 diabetes mellitus with stable proliferative diabetic retinopathy, bilateral |  |  |  |  |  |  |  |  |  |
|  | E103559 | Type 1 diabetes mellitus with stable proliferative diabetic retinopathy, unspecified eye |  |  |  |  |  |  |  |  |  |
|  | E103591 | Type 1 diabetes mellitus with proliferative diabetic retinopathy without macular edema, right eye |  |  |  |  |  |  |  |  |  |
|  | E103592 | Type 1 diabetes mellitus with proliferative diabetic retinopathy without macular edema, left eye |  |  |  |  |  |  |  |  |  |
|  | E103593 | Type 1 diabetes mellitus with proliferative diabetic retinopathy without macular edema, bilateral |  |  |  |  |  |  |  |  |  |
|  | E103599 | Type 1 diabetes mellitus with proliferative diabetic retinopathy without macular edema, unspecified eye |  |  |  |  |  |  |  |  |  |
|  | E1036 | Type 1 diabetes mellitus with diabetic cataract |  |  |  |  |  |  |  |  |  |
|  | E1037X1 | Type 1 diabetes mellitus with diabetic macular edema, resolved following treatment, right eye |  |  |  |  |  |  |  |  |  |
|  | E1037X2 | Type 1 diabetes mellitus with diabetic macular edema, resolved following treatment, left eye |  |  |  |  |  |  |  |  |  |
|  | E1037X3 | Type 1 diabetes mellitus with diabetic macular edema, resolved following treatment, bilateral |  |  |  |  |  |  |  |  |  |
|  | E1037X9 | Type 1 diabetes mellitus with diabetic macular edema, resolved following treatment, unspecified eye |  |  |  |  |  |  |  |  |  |
|  | E1039 | Type 1 diabetes mellitus with other diabetic ophthalmic complication |  |  |  |  |  |  |  |  |  |
|  | E1040 | Type 1 diabetes mellitus with diabetic neuropathy, unspecified |  |  |  |  |  |  |  |  |  |
|  | E1041 | Type 1 diabetes mellitus with diabetic mononeuropathy |  |  |  |  |  |  |  |  |  |
|  | E1042 | Type 1 diabetes mellitus with diabetic polyneuropathy |  |  |  |  |  |  |  |  |  |
|  | E1043 | Type 1 diabetes mellitus with diabetic autonomic (poly)neuropathy |  |  |  |  |  |  |  |  |  |
|  | E1044 | Type 1 diabetes mellitus with diabetic amyotrophy |  |  |  |  |  |  |  |  |  |
|  | E1049 | Type 1 diabetes mellitus with other diabetic neurological complication |  |  |  |  |  |  |  |  |  |
|  | E1051 | Type 1 diabetes mellitus with diabetic peripheral angiopathy without gangrene |  |  |  |  |  |  |  |  |  |
|  | E1052 | Type 1 diabetes mellitus with diabetic peripheral angiopathy with gangrene |  |  |  |  |  |  |  |  |  |
|  | E1059 | Type 1 diabetes mellitus with other circulatory complications |  |  |  |  |  |  |  |  |  |
|  | E10610 | Type 1 diabetes mellitus with diabetic neuropathic arthropathy |  |  |  |  |  |  |  |  |  |
|  | E10618 | Type 1 diabetes mellitus with other diabetic arthropathy |  |  |  |  |  |  |  |  |  |
|  | E10620 | Type 1 diabetes mellitus with diabetic dermatitis |  |  |  |  |  |  |  |  |  |
|  | E10621 | Type 1 diabetes mellitus with foot ulcer |  |  |  |  |  |  |  |  |  |
|  | E10622 | Type 1 diabetes mellitus with other skin ulcer |  |  |  |  |  |  |  |  |  |
|  | E10628 | Type 1 diabetes mellitus with other skin complications |  |  |  |  |  |  |  |  |  |
|  | E10630 | Type 1 diabetes mellitus with periodontal disease |  |  |  |  |  |  |  |  |  |
|  | E10638 | Type 1 diabetes mellitus with other oral complications |  |  |  |  |  |  |  |  |  |
|  | E10641 | Type 1 diabetes mellitus with hypoglycemia with coma |  |  |  |  |  |  |  |  |  |
|  | E10649 | Type 1 diabetes mellitus with hypoglycemia without coma |  |  |  |  |  |  |  |  |  |
|  | E1065 | Type 1 diabetes mellitus with hyperglycemia |  |  |  |  |  |  |  |  |  |
|  | E1069 | Type 1 diabetes mellitus with other specified complication |  |  |  |  |  |  |  |  |  |
|  | E108 | Type 1 diabetes mellitus with unspecified complications |  |  |  |  |  |  |  |  |  |
|  | E1100 | Type 2 diabetes mellitus with hyperosmolarity without nonketotic hyperglycemic-hyperosmolar coma (NKHHC) |  |  |  |  |  |  |  |  |  |
|  | E1101 | Type 2 diabetes mellitus with hyperosmolarity with coma |  |  |  |  |  |  |  |  |  |
|  | E1110 | Type 2 diabetes mellitus with ketoacidosis without coma |  |  |  |  |  |  |  |  |  |
|  | E1111 | Type 2 diabetes mellitus with ketoacidosis with coma |  |  |  |  |  |  |  |  |  |
|  | E1121 | Type 2 diabetes mellitus with diabetic nephropathy |  |  |  |  |  |  |  |  |  |
|  | E1122 | Type 2 diabetes mellitus with diabetic chronic kidney disease |  |  |  |  |  |  |  |  |  |
|  | E1129 | Type 2 diabetes mellitus with other diabetic kidney complication |  |  |  |  |  |  |  |  |  |
|  | E11311 | Type 2 diabetes mellitus with unspecified diabetic retinopathy with macular edema |  |  |  |  |  |  |  |  |  |
|  | E11319 | Type 2 diabetes mellitus with unspecified diabetic retinopathy without macular edema |  |  |  |  |  |  |  |  |  |
|  | E113211 | Type 2 diabetes mellitus with mild nonproliferative diabetic retinopathy with macular edema, right eye |  |  |  |  |  |  |  |  |  |
|  | E113212 | Type 2 diabetes mellitus with mild nonproliferative diabetic retinopathy with macular edema, left eye |  |  |  |  |  |  |  |  |  |
|  | E113213 | Type 2 diabetes mellitus with mild nonproliferative diabetic retinopathy with macular edema, bilateral |  |  |  |  |  |  |  |  |  |
|  | E113219 | Type 2 diabetes mellitus with mild nonproliferative diabetic retinopathy with macular edema, unspecified eye |  |  |  |  |  |  |  |  |  |
|  | E113291 | Type 2 diabetes mellitus with mild nonproliferative diabetic retinopathy without macular edema, right eye |  |  |  |  |  |  |  |  |  |
|  | E113292 | Type 2 diabetes mellitus with mild nonproliferative diabetic retinopathy without macular edema, left eye |  |  |  |  |  |  |  |  |  |
|  | E113293 | Type 2 diabetes mellitus with mild nonproliferative diabetic retinopathy without macular edema, bilateral |  |  |  |  |  |  |  |  |  |
|  | E113299 | Type 2 diabetes mellitus with mild nonproliferative diabetic retinopathy without macular edema, unspecified eye |  |  |  |  |  |  |  |  |  |
|  | E113311 | Type 2 diabetes mellitus with moderate nonproliferative diabetic retinopathy with macular edema, right eye |  |  |  |  |  |  |  |  |  |
|  | E113312 | Type 2 diabetes mellitus with moderate nonproliferative diabetic retinopathy with macular edema, left eye |  |  |  |  |  |  |  |  |  |
|  | E113313 | Type 2 diabetes mellitus with moderate nonproliferative diabetic retinopathy with macular edema, bilateral |  |  |  |  |  |  |  |  |  |
|  | E113319 | Type 2 diabetes mellitus with moderate nonproliferative diabetic retinopathy with macular edema, unspecified eye |  |  |  |  |  |  |  |  |  |
|  | E113391 | Type 2 diabetes mellitus with moderate nonproliferative diabetic retinopathy without macular edema, right eye |  |  |  |  |  |  |  |  |  |
|  | E113392 | Type 2 diabetes mellitus with moderate nonproliferative diabetic retinopathy without macular edema, left eye |  |  |  |  |  |  |  |  |  |
|  | E113393 | Type 2 diabetes mellitus with moderate nonproliferative diabetic retinopathy without macular edema, bilateral |  |  |  |  |  |  |  |  |  |
|  | E113399 | Type 2 diabetes mellitus with moderate nonproliferative diabetic retinopathy without macular edema, unspecified eye |  |  |  |  |  |  |  |  |  |
|  | E113411 | Type 2 diabetes mellitus with severe nonproliferative diabetic retinopathy with macular edema, right eye |  |  |  |  |  |  |  |  |  |
|  | E113412 | Type 2 diabetes mellitus with severe nonproliferative diabetic retinopathy with macular edema, left eye |  |  |  |  |  |  |  |  |  |
|  | E113413 | Type 2 diabetes mellitus with severe nonproliferative diabetic retinopathy with macular edema, bilateral |  |  |  |  |  |  |  |  |  |
|  | E113419 | Type 2 diabetes mellitus with severe nonproliferative diabetic retinopathy with macular edema, unspecified eye |  |  |  |  |  |  |  |  |  |
|  | E113491 | Type 2 diabetes mellitus with severe nonproliferative diabetic retinopathy without macular edema, right eye |  |  |  |  |  |  |  |  |  |
|  | E113492 | Type 2 diabetes mellitus with severe nonproliferative diabetic retinopathy without macular edema, left eye |  |  |  |  |  |  |  |  |  |
|  | E113493 | Type 2 diabetes mellitus with severe nonproliferative diabetic retinopathy without macular edema, bilateral |  |  |  |  |  |  |  |  |  |
|  | E113499 | Type 2 diabetes mellitus with severe nonproliferative diabetic retinopathy without macular edema, unspecified eye |  |  |  |  |  |  |  |  |  |
|  | E113511 | Type 2 diabetes mellitus with proliferative diabetic retinopathy with macular edema, right eye |  |  |  |  |  |  |  |  |  |
|  | E113512 | Type 2 diabetes mellitus with proliferative diabetic retinopathy with macular edema, left eye |  |  |  |  |  |  |  |  |  |
|  | E113513 | Type 2 diabetes mellitus with proliferative diabetic retinopathy with macular edema, bilateral |  |  |  |  |  |  |  |  |  |
|  | E113519 | Type 2 diabetes mellitus with proliferative diabetic retinopathy with macular edema, unspecified eye |  |  |  |  |  |  |  |  |  |
|  | E113521 | Type 2 diabetes mellitus with proliferative diabetic retinopathy with traction retinal detachment involving the macula, right eye |  |  |  |  |  |  |  |  |  |
|  | E113522 | Type 2 diabetes mellitus with proliferative diabetic retinopathy with traction retinal detachment involving the macula, left eye |  |  |  |  |  |  |  |  |  |
|  | E113523 | Type 2 diabetes mellitus with proliferative diabetic retinopathy with traction retinal detachment involving the macula, bilateral |  |  |  |  |  |  |  |  |  |
|  | E113529 | Type 2 diabetes mellitus with proliferative diabetic retinopathy with traction retinal detachment involving the macula, unspecified eye |  |  |  |  |  |  |  |  |  |
|  | E113531 | Type 2 diabetes mellitus with proliferative diabetic retinopathy with traction retinal detachment not involving the macula, right eye |  |  |  |  |  |  |  |  |  |
|  | E113532 | Type 2 diabetes mellitus with proliferative diabetic retinopathy with traction retinal detachment not involving the macula, left eye |  |  |  |  |  |  |  |  |  |
|  | E113533 | Type 2 diabetes mellitus with proliferative diabetic retinopathy with traction retinal detachment not involving the macula, bilateral |  |  |  |  |  |  |  |  |  |
|  | E113539 | Type 2 diabetes mellitus with proliferative diabetic retinopathy with traction retinal detachment not involving the macula, unspecified eye |  |  |  |  |  |  |  |  |  |
|  | E113541 | Type 2 diabetes mellitus with proliferative diabetic retinopathy with combined traction retinal detachment and rhegmatogenous retinal detachment, right eye |  |  |  |  |  |  |  |  |  |
|  | E113542 | Type 2 diabetes mellitus with proliferative diabetic retinopathy with combined traction retinal detachment and rhegmatogenous retinal detachment, left eye |  |  |  |  |  |  |  |  |  |
|  | E113543 | Type 2 diabetes mellitus with proliferative diabetic retinopathy with combined traction retinal detachment and rhegmatogenous retinal detachment, bilateral |  |  |  |  |  |  |  |  |  |
|  | E113549 | Type 2 diabetes mellitus with proliferative diabetic retinopathy with combined traction retinal detachment and rhegmatogenous retinal detachment, unspecified eye |  |  |  |  |  |  |  |  |  |
|  | E113551 | Type 2 diabetes mellitus with stable proliferative diabetic retinopathy, right eye |  |  |  |  |  |  |  |  |  |
|  | E113552 | Type 2 diabetes mellitus with stable proliferative diabetic retinopathy, left eye |  |  |  |  |  |  |  |  |  |
|  | E113553 | Type 2 diabetes mellitus with stable proliferative diabetic retinopathy, bilateral |  |  |  |  |  |  |  |  |  |
|  | E113559 | Type 2 diabetes mellitus with stable proliferative diabetic retinopathy, unspecified eye |  |  |  |  |  |  |  |  |  |
|  | E113591 | Type 2 diabetes mellitus with proliferative diabetic retinopathy without macular edema, right eye |  |  |  |  |  |  |  |  |  |
|  | E169 | Disorder of pancreatic internal secretion, unspecified |  |  |  |  |  |  |  |  |  |
|  | E113592 | Type 2 diabetes mellitus with proliferative diabetic retinopathy without macular edema, left eye |  |  |  |  |  |  |  |  |  |
|  | E113593 | Type 2 diabetes mellitus with proliferative diabetic retinopathy without macular edema, bilateral |  |  |  |  |  |  |  |  |  |
|  | E113599 | Type 2 diabetes mellitus with proliferative diabetic retinopathy without macular edema, unspecified eye |  |  |  |  |  |  |  |  |  |
|  | E1136 | Type 2 diabetes mellitus with diabetic cataract |  |  |  |  |  |  |  |  |  |
|  | E1137X1 | Type 2 diabetes mellitus with diabetic macular edema, resolved following treatment, right eye |  |  |  |  |  |  |  |  |  |
|  | E1137X2 | Type 2 diabetes mellitus with diabetic macular edema, resolved following treatment, left eye |  |  |  |  |  |  |  |  |  |
|  | E1137X3 | Type 2 diabetes mellitus with diabetic macular edema, resolved following treatment, bilateral |  |  |  |  |  |  |  |  |  |
|  | E1137X9 | Type 2 diabetes mellitus with diabetic macular edema, resolved following treatment, unspecified eye |  |  |  |  |  |  |  |  |  |
|  | E1139 | Type 2 diabetes mellitus with other diabetic ophthalmic complication |  |  |  |  |  |  |  |  |  |
|  | E1140 | Type 2 diabetes mellitus with diabetic neuropathy, unspecified |  |  |  |  |  |  |  |  |  |
|  | E1141 | Type 2 diabetes mellitus with diabetic mononeuropathy |  |  |  |  |  |  |  |  |  |
|  | E1142 | Type 2 diabetes mellitus with diabetic polyneuropathy |  |  |  |  |  |  |  |  |  |
|  | E1143 | Type 2 diabetes mellitus with diabetic autonomic (poly)neuropathy |  |  |  |  |  |  |  |  |  |
|  | E1144 | Type 2 diabetes mellitus with diabetic amyotrophy |  |  |  |  |  |  |  |  |  |
|  | E1149 | Type 2 diabetes mellitus with other diabetic neurological complication |  |  |  |  |  |  |  |  |  |
|  | E1151 | Type 2 diabetes mellitus with diabetic peripheral angiopathy without gangrene |  |  |  |  |  |  |  |  |  |
|  | E1152 | Type 2 diabetes mellitus with diabetic peripheral angiopathy with gangrene |  |  |  |  |  |  |  |  |  |
|  | E1159 | Type 2 diabetes mellitus with other circulatory complications |  |  |  |  |  |  |  |  |  |
|  | E11610 | Type 2 diabetes mellitus with diabetic neuropathic arthropathy |  |  |  |  |  |  |  |  |  |
|  | E11618 | Type 2 diabetes mellitus with other diabetic arthropathy |  |  |  |  |  |  |  |  |  |
|  | E11620 | Type 2 diabetes mellitus with diabetic dermatitis |  |  |  |  |  |  |  |  |  |
|  | E11621 | Type 2 diabetes mellitus with foot ulcer |  |  |  |  |  |  |  |  |  |
|  | E11622 | Type 2 diabetes mellitus with other skin ulcer |  |  |  |  |  |  |  |  |  |
|  | E11628 | Type 2 diabetes mellitus with other skin complications |  |  |  |  |  |  |  |  |  |
|  | E11630 | Type 2 diabetes mellitus with periodontal disease |  |  |  |  |  |  |  |  |  |
|  | E11638 | Type 2 diabetes mellitus with other oral complications |  |  |  |  |  |  |  |  |  |
|  | E11641 | Type 2 diabetes mellitus with hypoglycemia with coma |  |  |  |  |  |  |  |  |  |
|  | E11649 | Type 2 diabetes mellitus with hypoglycemia without coma |  |  |  |  |  |  |  |  |  |
|  | E1165 | Type 2 diabetes mellitus with hyperglycemia |  |  |  |  |  |  |  |  |  |
|  | E1169 | Type 2 diabetes mellitus with other specified complication |  |  |  |  |  |  |  |  |  |
|  | E118 | Type 2 diabetes mellitus with unspecified complications |  |  |  |  |  |  |  |  |  |
|  | E119 | Type 2 diabetes mellitus without complications |  |  |  |  |  |  |  |  |  |
|  | E1300 | Other specified diabetes mellitus with hyperosmolarity without nonketotic hyperglycemic-hyperosmolar coma (NKHHC) |  |  |  |  |  |  |  |  |  |
|  | E1301 | Other specified diabetes mellitus with hyperosmolarity with coma |  |  |  |  |  |  |  |  |  |
|  | E1310 | Other specified diabetes mellitus with ketoacidosis without coma |  |  |  |  |  |  |  |  |  |
|  | E1311 | Other specified diabetes mellitus with ketoacidosis with coma |  |  |  |  |  |  |  |  |  |
|  | E1321 | Other specified diabetes mellitus with diabetic nephropathy |  |  |  |  |  |  |  |  |  |
|  | E1322 | Other specified diabetes mellitus with diabetic chronic kidney disease |  |  |  |  |  |  |  |  |  |
|  | E1329 | Other specified diabetes mellitus with other diabetic kidney complication |  |  |  |  |  |  |  |  |  |
|  | E13311 | Other specified diabetes mellitus with unspecified diabetic retinopathy with macular edema |  |  |  |  |  |  |  |  |  |
|  | E13319 | Other specified diabetes mellitus with unspecified diabetic retinopathy without macular edema |  |  |  |  |  |  |  |  |  |
|  | E133211 | Other specified diabetes mellitus with mild nonproliferative diabetic retinopathy with macular edema, right eye |  |  |  |  |  |  |  |  |  |
|  | E133212 | Other specified diabetes mellitus with mild nonproliferative diabetic retinopathy with macular edema, left eye |  |  |  |  |  |  |  |  |  |
|  | E133213 | Other specified diabetes mellitus with mild nonproliferative diabetic retinopathy with macular edema, bilateral |  |  |  |  |  |  |  |  |  |
|  | E133219 | Other specified diabetes mellitus with mild nonproliferative diabetic retinopathy with macular edema, unspecified eye |  |  |  |  |  |  |  |  |  |
|  | E133291 | Other specified diabetes mellitus with mild nonproliferative diabetic retinopathy without macular edema, right eye |  |  |  |  |  |  |  |  |  |
|  | E133292 | Other specified diabetes mellitus with mild nonproliferative diabetic retinopathy without macular edema, left eye |  |  |  |  |  |  |  |  |  |
|  | E133293 | Other specified diabetes mellitus with mild nonproliferative diabetic retinopathy without macular edema, bilateral |  |  |  |  |  |  |  |  |  |
|  | E133299 | Other specified diabetes mellitus with mild nonproliferative diabetic retinopathy without macular edema, unspecified eye |  |  |  |  |  |  |  |  |  |
|  | E133311 | Other specified diabetes mellitus with moderate nonproliferative diabetic retinopathy with macular edema, right eye |  |  |  |  |  |  |  |  |  |
|  | E133312 | Other specified diabetes mellitus with moderate nonproliferative diabetic retinopathy with macular edema, left eye |  |  |  |  |  |  |  |  |  |
|  | E133313 | Other specified diabetes mellitus with moderate nonproliferative diabetic retinopathy with macular edema, bilateral |  |  |  |  |  |  |  |  |  |
|  | E133319 | Other specified diabetes mellitus with moderate nonproliferative diabetic retinopathy with macular edema, unspecified eye |  |  |  |  |  |  |  |  |  |
|  | E133391 | Other specified diabetes mellitus with moderate nonproliferative diabetic retinopathy without macular edema, right eye |  |  |  |  |  |  |  |  |  |
|  | E133392 | Other specified diabetes mellitus with moderate nonproliferative diabetic retinopathy without macular edema, left eye |  |  |  |  |  |  |  |  |  |
|  | E133393 | Other specified diabetes mellitus with moderate nonproliferative diabetic retinopathy without macular edema, bilateral |  |  |  |  |  |  |  |  |  |
|  | E133399 | Other specified diabetes mellitus with moderate nonproliferative diabetic retinopathy without macular edema, unspecified eye |  |  |  |  |  |  |  |  |  |
|  | E133411 | Other specified diabetes mellitus with severe nonproliferative diabetic retinopathy with macular edema, right eye |  |  |  |  |  |  |  |  |  |
|  | E133412 | Other specified diabetes mellitus with severe nonproliferative diabetic retinopathy with macular edema, left eye |  |  |  |  |  |  |  |  |  |
|  | E133413 | Other specified diabetes mellitus with severe nonproliferative diabetic retinopathy with macular edema, bilateral |  |  |  |  |  |  |  |  |  |
|  | E133419 | Other specified diabetes mellitus with severe nonproliferative diabetic retinopathy with macular edema, unspecified eye |  |  |  |  |  |  |  |  |  |
|  | E133491 | Other specified diabetes mellitus with severe nonproliferative diabetic retinopathy without macular edema, right eye |  |  |  |  |  |  |  |  |  |
|  | E133492 | Other specified diabetes mellitus with severe nonproliferative diabetic retinopathy without macular edema, left eye |  |  |  |  |  |  |  |  |  |
|  | E133493 | Other specified diabetes mellitus with severe nonproliferative diabetic retinopathy without macular edema, bilateral |  |  |  |  |  |  |  |  |  |
|  | E133499 | Other specified diabetes mellitus with severe nonproliferative diabetic retinopathy without macular edema, unspecified eye |  |  |  |  |  |  |  |  |  |
|  | E133511 | Other specified diabetes mellitus with proliferative diabetic retinopathy with macular edema, right eye |  |  |  |  |  |  |  |  |  |
|  | E133512 | Other specified diabetes mellitus with proliferative diabetic retinopathy with macular edema, left eye |  |  |  |  |  |  |  |  |  |
|  | E133513 | Other specified diabetes mellitus with proliferative diabetic retinopathy with macular edema, bilateral |  |  |  |  |  |  |  |  |  |
|  | E133519 | Other specified diabetes mellitus with proliferative diabetic retinopathy with macular edema, unspecified eye |  |  |  |  |  |  |  |  |  |
|  | E133521 | Other specified diabetes mellitus with proliferative diabetic retinopathy with traction retinal detachment involving the macula, right eye |  |  |  |  |  |  |  |  |  |
|  | E133522 | Other specified diabetes mellitus with proliferative diabetic retinopathy with traction retinal detachment involving the macula, left eye |  |  |  |  |  |  |  |  |  |
|  | E133523 | Other specified diabetes mellitus with proliferative diabetic retinopathy with traction retinal detachment involving the macula, bilateral |  |  |  |  |  |  |  |  |  |
|  | E133529 | Other specified diabetes mellitus with proliferative diabetic retinopathy with traction retinal detachment involving the macula, unspecified eye |  |  |  |  |  |  |  |  |  |
|  | E133531 | Other specified diabetes mellitus with proliferative diabetic retinopathy with traction retinal detachment not involving the macula, right eye |  |  |  |  |  |  |  |  |  |
|  | E133532 | Other specified diabetes mellitus with proliferative diabetic retinopathy with traction retinal detachment not involving the macula, left eye |  |  |  |  |  |  |  |  |  |
|  | E133533 | Other specified diabetes mellitus with proliferative diabetic retinopathy with traction retinal detachment not involving the macula, bilateral |  |  |  |  |  |  |  |  |  |
|  | E133539 | Other specified diabetes mellitus with proliferative diabetic retinopathy with traction retinal detachment not involving the macula, unspecified eye |  |  |  |  |  |  |  |  |  |
|  | E133541 | Other specified diabetes mellitus with proliferative diabetic retinopathy with combined traction retinal detachment and rhegmatogenous retinal detachment, right eye |  |  |  |  |  |  |  |  |  |
|  | E133542 | Other specified diabetes mellitus with proliferative diabetic retinopathy with combined traction retinal detachment and rhegmatogenous retinal detachment, left eye |  |  |  |  |  |  |  |  |  |
|  | E133543 | Other specified diabetes mellitus with proliferative diabetic retinopathy with combined traction retinal detachment and rhegmatogenous retinal detachment, bilateral |  |  |  |  |  |  |  |  |  |
|  | E133549 | Other specified diabetes mellitus with proliferative diabetic retinopathy with combined traction retinal detachment and rhegmatogenous retinal detachment, unspecified eye |  |  |  |  |  |  |  |  |  |
|  | E133551 | Other specified diabetes mellitus with stable proliferative diabetic retinopathy, right eye |  |  |  |  |  |  |  |  |  |
|  | E133552 | Other specified diabetes mellitus with stable proliferative diabetic retinopathy, left eye |  |  |  |  |  |  |  |  |  |
|  | E133553 | Other specified diabetes mellitus with stable proliferative diabetic retinopathy, bilateral |  |  |  |  |  |  |  |  |  |
|  | E133559 | Other specified diabetes mellitus with stable proliferative diabetic retinopathy, unspecified eye |  |  |  |  |  |  |  |  |  |
|  | E133591 | Other specified diabetes mellitus with proliferative diabetic retinopathy without macular edema, right eye |  |  |  |  |  |  |  |  |  |
|  | E133592 | Other specified diabetes mellitus with proliferative diabetic retinopathy without macular edema, left eye |  |  |  |  |  |  |  |  |  |
|  | E133593 | Other specified diabetes mellitus with proliferative diabetic retinopathy without macular edema, bilateral |  |  |  |  |  |  |  |  |  |
|  | E133599 | Other specified diabetes mellitus with proliferative diabetic retinopathy without macular edema, unspecified eye |  |  |  |  |  |  |  |  |  |
|  | E1336 | Other specified diabetes mellitus with diabetic cataract |  |  |  |  |  |  |  |  |  |
|  | E1337X1 | Other specified diabetes mellitus with diabetic macular edema, resolved following treatment, right eye |  |  |  |  |  |  |  |  |  |
|  | E1337X2 | Other specified diabetes mellitus with diabetic macular edema, resolved following treatment, left eye |  |  |  |  |  |  |  |  |  |
|  | E1337X3 | Other specified diabetes mellitus with diabetic macular edema, resolved following treatment, bilateral |  |  |  |  |  |  |  |  |  |
|  | E1337X9 | Other specified diabetes mellitus with diabetic macular edema, resolved following treatment, unspecified eye |  |  |  |  |  |  |  |  |  |
|  | E1339 | Other specified diabetes mellitus with other diabetic ophthalmic complication |  |  |  |  |  |  |  |  |  |
|  | E1340 | Other specified diabetes mellitus with diabetic neuropathy, unspecified |  |  |  |  |  |  |  |  |  |
|  | E1341 | Other specified diabetes mellitus with diabetic mononeuropathy |  |  |  |  |  |  |  |  |  |
|  | E1342 | Other specified diabetes mellitus with diabetic polyneuropathy |  |  |  |  |  |  |  |  |  |
|  | E1343 | Other specified diabetes mellitus with diabetic autonomic (poly)neuropathy |  |  |  |  |  |  |  |  |  |
|  | E1344 | Other specified diabetes mellitus with diabetic amyotrophy |  |  |  |  |  |  |  |  |  |
|  | E1349 | Other specified diabetes mellitus with other diabetic neurological complication |  |  |  |  |  |  |  |  |  |
|  | E1351 | Other specified diabetes mellitus with diabetic peripheral angiopathy without gangrene |  |  |  |  |  |  |  |  |  |
|  | E1352 | Other specified diabetes mellitus with diabetic peripheral angiopathy with gangrene |  |  |  |  |  |  |  |  |  |
|  | E1359 | Other specified diabetes mellitus with other circulatory complications |  |  |  |  |  |  |  |  |  |
|  | E13610 | Other specified diabetes mellitus with diabetic neuropathic arthropathy |  |  |  |  |  |  |  |  |  |
|  | E13618 | Other specified diabetes mellitus with other diabetic arthropathy |  |  |  |  |  |  |  |  |  |
|  | E13620 | Other specified diabetes mellitus with diabetic dermatitis |  |  |  |  |  |  |  |  |  |
|  | E13621 | Other specified diabetes mellitus with foot ulcer |  |  |  |  |  |  |  |  |  |
|  | E13622 | Other specified diabetes mellitus with other skin ulcer |  |  |  |  |  |  |  |  |  |
|  | E13628 | Other specified diabetes mellitus with other skin complications |  |  |  |  |  |  |  |  |  |
|  | E13630 | Other specified diabetes mellitus with periodontal disease |  |  |  |  |  |  |  |  |  |
|  | E13638 | Other specified diabetes mellitus with other oral complications |  |  |  |  |  |  |  |  |  |
|  | E13641 | Other specified diabetes mellitus with hypoglycemia with coma |  |  |  |  |  |  |  |  |  |
|  | E13649 | Other specified diabetes mellitus with hypoglycemia without coma |  |  |  |  |  |  |  |  |  |
|  | E1365 | Other specified diabetes mellitus with hyperglycemia |  |  |  |  |  |  |  |  |  |
|  | E1369 | Other specified diabetes mellitus with other specified complication |  |  |  |  |  |  |  |  |  |
|  | E138 | Other specified diabetes mellitus with unspecified complications |  |  |  |  |  |  |  |  |  |
|  |  |  |  |  |  |  |  |  |  |  |  |
